# Supplementary material for: Molecular and Cellular Changes in the Lumbar Spinal Cord following Thoracic Injury: Regulation by Treadmill Locomotor Training
Source: PubMed Central journal article supplement (PMC3919755; doi:10.1371/journal.pone.0088215), 2014-02-10
Supplement: pone.0088215.s001.pdf [file pone.0088215.s001.pdf]

**Table S1. A list of genes that were differentially expressed only at 1-week time point**

| Probe ID                 | Gene symbol | Gene full name                                                                                                                 | Log2 (fold change) | p Value |
|--------------------------|-------------|--------------------------------------------------------------------------------------------------------------------------------|--------------------|---------|
| <b>Upregulated genes</b> |             |                                                                                                                                |                    |         |
| 1378640_at               | Uhrf1       | ubiquitin-like with PHD and ring finger domains 1                                                                              | 2.12               | 0.04069 |
| 1377146_at               | Vip         | vasoactive intestinal peptide                                                                                                  | 1.96               | 0.03927 |
| 1393041_at               | Smc2        | structural maintenance of chromosomes 2                                                                                        | 1.74               | 0.03731 |
| 1385213_at               | Epst1       | epithelial stromal interaction 1 (breast)                                                                                      | 1.59               | 0.00736 |
| 1389011_at               | Nsmc2       | non-SMC element 2, MMS21 homolog ( <i>S. cerevisiae</i> )                                                                      | 1.54               | 0.01602 |
| 1368327_at               | Slc12a9     | solute carrier family 12 (potassium/chloride transporters), member 9                                                           | 1.42               | 0.03358 |
| 1369047_at               | Sult1d1     | sulfotransferase family 1D, member 1                                                                                           | 1.36               | 0.00504 |
| 1395715_at               | Cdgap       | cdc42 GTPase-activating protein                                                                                                | 1.32               | 0.01704 |
| 1373523_at               | Fcgr3a      | Fc fragment of IgG, low affinity IIIa, receptor                                                                                | 1.29               | 0.04672 |
| 1369290_at               | Ccr5        | chemokine (C-C motif) receptor 5                                                                                               | 1.27               | 0.00809 |
| 1376377_at               | LOC290396   | similar to Diaph3 diaphanous homolog 3 ( <i>Drosophila</i> )                                                                   | 1.26               | 0.00661 |
| 1371541_at               | Mylk        | myosin light chain kinase                                                                                                      | 1.18               | 0.04508 |
| 1391108_at               | Znf593      | zinc finger protein 593                                                                                                        | 1.13               | 0.02540 |
| 1387270_at               | Hhex        | hematopoietically expressed homeobox                                                                                           | 1.13               | 0.02310 |
| 1389425_at               | LOC688261   | similar to 5(3)-deoxyribonucleotidase, cytosolic type (Cytosolic 5,3-pyrimidine nucleotidase) (Deoxy-5-nucleotidase 1) (dNT-1) | 1.10               | 0.03889 |
| 1383377_at               | Gabpa       | GA binding protein transcription factor, alpha subunit                                                                         | 1.10               | 0.04734 |
| 1389568_at               | Calhm2      | calcium homeostasis modulator 2                                                                                                | 1.08               | 0.03147 |
| 1390830_at               | LOC499602   | hypothetical protein LOC499602                                                                                                 | 1.08               | 0.02668 |
| 1388157_at               | Marcks      | myristoylated alanine rich protein kinase C substrate                                                                          | 1.08               | 0.01160 |
| 1383271_at               | Ccdc59      | coiled-coil domain containing 59                                                                                               | 1.07               | 0.03619 |
| 1389253_at               | Vnn1        | vanin 1                                                                                                                        | 1.04               | 0.04761 |
| 1389838_at               | LOC681252   | similar to myristoylated alanine-rich C-kinase substrate (MARCKS)                                                              | 1.04               | 0.00805 |
| 1388157_at               | LOC294446   | similar to myristoylated alanine-rich C-kinase substrate (MARCKS) (ACAMP-81)                                                   | 1.04               | 0.00805 |
| 1380517_at               | Zmym3       | zinc finger, MYM-type 3                                                                                                        | 1.04               | 0.00907 |
| 1391864_at               | Enpp6       | ectonucleotide pyrophosphatase/phosphodiesterase 6                                                                             | 1.02               | 0.03585 |
| 1368754_at               | P2ry6       | pyrimidinergic receptor P2Y, G-protein coupled, 6                                                                              | 1.00               | 0.00205 |
| 1367570_at               | Tagln       | transgelin                                                                                                                     | 0.99               | 0.02559 |
| 1382874_at               | LOC304860   | N-acetylneuraminase pyruvate lyase                                                                                             | 0.93               | 0.00792 |
| 1386925_at               | Arpc1b      | actin related protein 2/3 complex, subunit 1B                                                                                  | 0.92               | 0.03370 |
| 1397620_at               | Sh3rf1      | SH3 domain containing ring finger 1                                                                                            | 0.91               | 0.00889 |
| 1393038_at               | Fcgr1a      | Fc fragment of IgG, high affinity Ia, receptor (CD64)                                                                          | 0.91               | 0.02190 |
| 1382206_a_at             | Akap2       | A kinase (PRKA) anchor protein 2                                                                                               | 0.91               | 0.01535 |
| 1394999_at               | RGD1562617  | similar to RAB7-like protein                                                                                                   | 0.90               | 0.00257 |
| 1370139_a_at             | Trpc6       | transient receptor potential cation channel, subfamily C, member 6                                                             | 0.90               | 0.04455 |
| 1369157_at               | Pde3b       | phosphodiesterase 3B, cGMP-inhibited                                                                                           | 0.89               | 0.02056 |
| 1379659_at               | Bmp2k       | BMP-2 inducible kinase                                                                                                         | 0.88               | 0.02213 |
| 1383914_at               | LOC286991   | putative retrovirus-related gag protein                                                                                        | 0.88               | 0.00353 |
| 1383419_at               | Lhfp3       | lipoma HMGIC fusion partner-like 3                                                                                             | 0.88               | 0.00448 |
| 1379475_at               | RGD1563120  | similar to RIKEN cDNA 2210009G21                                                                                               | 0.86               | 0.03588 |
| 1376411_at               | LOC304037   | ADP-ribosylation factor-like 13B                                                                                               | 0.86               | 0.04224 |
| 1373546_at               | Atp11c      | ATPase, class VI, type 11C                                                                                                     | 0.85               | 0.04039 |
| 1393459_at               | Fmr1        | fragile X mental retardation 1                                                                                                 | 0.84               | 0.01817 |
| 1393201_at               | Lrmp        | lymphoid-restricted membrane protein                                                                                           | 0.83               | 0.00484 |
| 1370045_at               | Polg        | polymerase (DNA directed), gamma                                                                                               | 0.82               | 0.00049 |
| 1387248_at               | Kenj5       | potassium inwardly-rectifying channel, subfamily J, member 5                                                                   | 0.82               | 0.01355 |
| 1376858_at               | LOC686809   | similar to protein 7 transactivated by hepatitis B virus X antigen                                                             | 0.82               | 0.04302 |
| 1367723_a_at             | Sh2b3       | SH2B adaptor protein 3                                                                                                         | 0.81               | 0.02486 |
| 1373785_at               | LOC362792   | phospholipase D family, member 4                                                                                               | 0.81               | 0.04507 |
| 1397471_at               | LOC690976   | similar to Calponin-2 (Calponin H2, smooth muscle)                                                                             | 0.80               | 0.02395 |
| 1368280_at               | Ctsc        | cathepsin C                                                                                                                    | 0.80               | 0.01798 |
| 1369006_at               | Hk2         | hexokinase 2                                                                                                                   | 0.79               | 0.03270 |
| 1391475_at               | Hnrpl       | heterogeneous nuclear ribonucleoprotein L-like                                                                                 | 0.78               | 0.04529 |
| 1384500_at               | RGD1305604  | coiled-coil domain containing 30                                                                                               | 0.78               | 0.03672 |
| 1385426_at               | Ccdc109b    | coiled-coil domain containing 109B                                                                                             | 0.77               | 0.04720 |
| 1368490_at               | Cd14        | cd14 molecule                                                                                                                  | 0.77               | 0.03440 |
| 1383319_at               | Slc4a10     | solute carrier family 4, sodium bicarbonate transporter-like, member 10                                                        | 0.76               | 0.03901 |
| 1387247_at               | Pcsk1       | proprotein convertase subtilisin/kexin type 1                                                                                  | 0.76               | 0.01450 |
| 1395015_at               | F8          | coagulation factor VIII, procoagulant component                                                                                | 0.76               | 0.03143 |
| 1378003_at               | Lrrc8b      | leucine rich repeat containing 8 family, member B                                                                              | 0.76               | 0.01201 |
| 1376591_a_at             | LOC690263   | transmembrane protein 179B                                                                                                     | 0.76               | 0.01555 |
| 1379232_at               | LOC686471   | hypothetical protein LOC686471                                                                                                 | 0.76               | 0.01555 |
| 1378032_at               | Nfkbi2      | nuclear factor of kappa light polypeptide gene enhancer in B-cells inhibitor, zeta                                             | 0.75               | 0.04500 |
| 1388711_at               | Il13ra1     | interleukin 13 receptor, alpha 1                                                                                               | 0.75               | 0.04098 |
| 1396123_at               | Tctex1d2    | tctex1 domain containing 2                                                                                                     | 0.75               | 0.02465 |
| 1374281_at               | Ino80       | ino80 homolog ( <i>S. cerevisiae</i> )                                                                                         | 0.74               | 0.01953 |
| 1369956_at               | Ifngr1      | interferon gamma receptor 1                                                                                                    | 0.74               | 0.01666 |
| 1376039_at               | Aurka       | aurora kinase A                                                                                                                | 0.74               | 0.00274 |
| 1372846_at               | Cybc3       | cytochrome b, ascorbate dependent 3                                                                                            | 0.73               | 0.03960 |
| 1374134_at               | Elk3        | elk3, member of ETS oncogene family                                                                                            | 0.73               | 0.02401 |
| 1383895_at               | Dynlrb2     | dynein light chain roadblock-type 2                                                                                            | 0.72               | 0.02030 |
| 1394787_at               | RGD1309138  | similar to hypothetical protein MGC9912                                                                                        | 0.72               | 0.03353 |
| 1376144_at               | Parp9       | poly (ADP-ribose) polymerase family, member 9                                                                                  | 0.71               | 0.00628 |
| 1379075_at               | Mboat2      | membrane bound O-acyltransferase domain containing 2                                                                           | 0.70               | 0.04333 |
| 1373262_at               | RGD1309543  | similar to 2310014H01Rik protein                                                                                               | 0.70               | 0.04165 |
| 1389643_at               | Wiz         | widely-interspaced zinc finger motifs                                                                                          | 0.70               | 0.02907 |
| 1383988_at               | LOC679150   | hypothetical protein LOC679150                                                                                                 | 0.70               | 0.01369 |
| 1374544_at               | Mgc112715   | platelet receptor G124                                                                                                         | 0.70               | 0.01369 |
| 1378225_at               | Mmp14       | matrix metalloproteinase 14 (membrane-inserted)                                                                                | 0.69               | 0.04126 |
| 1392592_at               | LOC679869   | similar to transcription factor 7-like 2, T-cell specific, HMG-box                                                             | 0.69               | 0.01177 |
| 1369242_at               | Pax6        | paired box 6                                                                                                                   | 0.68               | 0.01445 |
| 1370914_at               | Dnttip2     | deoxynucleotidyltransferase, terminal, interacting protein 2                                                                   | 0.68               | 0.02536 |
| 1372706_at               | Hexb        | hexosaminidase B                                                                                                               | 0.68               | 0.00516 |
| 1390312_at               | LOC500015   | sterile alpha motif domain containing 9-like                                                                                   | 0.68               | 0.02814 |
| 1373421_at               | RGD1560115  | tgfb-induced factor homeobox 2                                                                                                 | 0.68               | 0.04655 |
| 1388015_at               | Ptptr1      | protein tyrosine phosphatase, receptor-type, Z polypeptide 1                                                                   | 0.67               | 0.02838 |

| Probe ID                   | Gene symbol | Gene full name                                                                                           | Log2 (fold change) | p Value |
|----------------------------|-------------|----------------------------------------------------------------------------------------------------------|--------------------|---------|
| 1368742_at                 | C5ar1       | complement component 5a receptor 1                                                                       | 0.67               | 0.03182 |
| 1387434_at                 | Slc22a4     | solute carrier family 22 (organic cation transporter), member 4                                          | 0.67               | 0.01557 |
| 1387566_at                 | Pla2g4a     | phospholipase A2, group IVA (cytosolic, calcium-dependent)                                               | 0.67               | 0.01063 |
| 1384954_at                 | Hs3st3b1    | heparan sulfate (glucosamine) 3-O-sulfotransferase 3B1                                                   | 0.67               | 0.02365 |
| 1377886_at                 | Trim6       | tripartite motif-containing 6                                                                            | 0.66               | 0.00520 |
| 1386027_at                 | Rp2h        | retinitis pigmentosa 2 homolog (human)                                                                   | 0.66               | 0.04596 |
| 1373273_at                 | Prpf38a     | prp38 pre-mRNA processing factor 38 (yeast) domain containing A                                          | 0.66               | 0.03141 |
| 1390784_at                 | Wdr36       | wd repeat domain 36                                                                                      | 0.66               | 0.03981 |
| 1373391_at                 | Specc1      | sperm antigen with calponin homology and coiled-coil domains 1                                           | 0.65               | 0.02197 |
| 1390048_at                 | LOC685890   | serine/arginine repetitive matrix 3                                                                      | 0.65               | 0.02412 |
| 1387327_at                 | Khdrbs2     | KH domain containing, RNA binding, signal transduction associated 2                                      | 0.64               | 0.04423 |
| 1383915_at                 | LOC686184   | similar to Putative deoxyribose-phosphate aldolase (Phosphodeoxyriboaldolase) (Deoxyriboaldolase) (DERA) | 0.64               | 0.02880 |
| 1375954_at                 | S100a13     | s100 calcium binding protein A13                                                                         | 0.63               | 0.01298 |
| 1387513_at                 | Cyth3       | cytohesin 3                                                                                              | 0.63               | 0.00877 |
| 1374487_at                 | Fam96a      | family with sequence similarity 96, member A                                                             | 0.63               | 0.02104 |
| 1391766_at                 | Hs3st5      | heparan sulfate (glucosamine) 3-O-sulfotransferase 5                                                     | 0.63               | 0.02104 |
| 1389771_at                 | LOC681217   | zinc finger protein 862                                                                                  | 0.62               | 0.03591 |
| 1379295_at                 | LOC690825   | guanine nucleotide binding protein (G protein), gamma transducing activity polypeptide 2                 | 0.62               | 0.02077 |
| 1394006_at                 | Psme1       | proteasome (prosome, macropain) activator subunit 1                                                      | 0.62               | 0.00298 |
| 1369725_at                 | Adap2       | ArfGAP with dual PH domains 2                                                                            | 0.62               | 0.01856 |
| 1392326_at                 | Dnah12      | dynein, axonemal, heavy chain 12                                                                         | 0.62               | 0.02806 |
| 1384035_at                 | LOC686794   | similar to liver-specific bHLH-Zip transcription factor                                                  | 0.61               | 0.02252 |
| 1379320_at                 | Snrpd1      | small nuclear ribonucleoprotein D1                                                                       | 0.61               | 0.04006 |
| 1390797_at                 | Lcp2        | lymphocyte cytosolic protein 2                                                                           | 0.61               | 0.01003 |
| 1384254_at                 | Otu1        | OTU domain containing 1                                                                                  | 0.61               | 0.01411 |
| 1381836_at                 | LOC689377   | member RAS oncogene family                                                                               | 0.61               | 0.01852 |
| 1390887_at                 | RGD1309995  | similar to CG13957-PA                                                                                    | 0.60               | 0.00955 |
| 1373860_at                 | Sox4        | SRY (sex determining region Y)-box 4                                                                     | 0.60               | 0.00121 |
| 1374842_at                 | Cebpz       | CCAAT/enhancer binding protein zeta                                                                      | 0.60               | 0.04015 |
| 1373817_at                 | Ing5        | inhibitor of growth family, member 5                                                                     | 0.60               | 0.01615 |
| 1387946_at                 | Lgals3bp    | lectin, galactoside-binding, soluble, 3 binding protein                                                  | 0.59               | 0.04903 |
| 1370078_at                 | LOC360888   | similar to lin-9 homolog (C. elegans)                                                                    | 0.59               | 0.00781 |
| 1383290_at                 | Spint1      | serine peptidase inhibitor, Kunitz type 1                                                                | 0.59               | 0.03930 |
| 1387659_at                 | Gda         | guanine deaminase                                                                                        | 0.59               | 0.01482 |
| 1368851_at                 | Ets1        | v-ets erythroblastosis virus E26 oncogene homolog 1 (avian)                                              | 0.59               | 0.02888 |
| <b>Downregulated genes</b> |             |                                                                                                          |                    |         |
| 1387406_at                 | Uhmk1       | U2AF homology motif (UHM) kinase 1                                                                       | -1.48              | 0.02802 |
| 1373300_at                 | RGD1306151  | similar to hypothetical protein DKFZp761D0211                                                            | -1.27              | 0.03575 |
| 1395074_at                 | Tdg         | thymine-DNA glycosylase                                                                                  | -1.15              | 0.03463 |
| 1397867_at                 | Akap6       | A kinase (PRKA) anchor protein 6                                                                         | -1.15              | 0.04339 |
| 1369168_a_at               | Clock       | clock homolog (mouse)                                                                                    | -1.14              | 0.04725 |
| 1390812_a_at               | Rerg        | RAS-like, estrogen-regulated, growth-inhibitor                                                           | -1.10              | 0.03275 |
| 1369517_at                 | Cyth1       | cytohesin 1                                                                                              | -1.09              | 0.04121 |
| 1381300_at                 | RGD1562390  | similar to RGD, leucine-rich repeat, tropomodulin and proline-rich containing protein                    | -1.09              | 0.04670 |
| 1373046_at                 | Boll        | bol, boule-like (Drosophila)                                                                             | -1.07              | 0.02265 |
| 1369117_at                 | Calca       | calcitonin-related polypeptide alpha                                                                     | -1.07              | 0.02481 |
| 1369129_at                 | Rasgrp1     | RAS guanyl releasing protein 1 (calcium and DAG-regulated)                                               | -1.03              | 0.01424 |
| 1367753_at                 | Sec31a      | SEC31 homolog A (S. cerevisiae)                                                                          | -1.03              | 0.01292 |
| 1389774_at                 | Znf23       | zinc finger protein 23 (KOX 16)                                                                          | -1.02              | 0.04429 |
| 1374664_at                 | Znf787      | zinc finger protein 787                                                                                  | -0.95              | 0.02634 |
| 1398108_at                 | Arhgdia     | rho GDP dissociation inhibitor (GDI) alpha                                                               | -0.92              | 0.00375 |
| 1370233_at                 | Fgf12       | fibroblast growth factor 12                                                                              | -0.92              | 0.04584 |
| 1374654_at                 | Btrc        | beta-transducin repeat containing                                                                        | -0.92              | 0.03578 |
| 1367591_at                 | Prdx3       | peroxiredoxin 3                                                                                          | -0.88              | 0.00033 |
| 1372968_at                 | Sbf1        | SET binding factor 1                                                                                     | -0.88              | 0.04781 |
| 1392883_at                 | RGD1305269  | Limch1 LIM and calponin homology domains 1                                                               | -0.87              | 0.01744 |
| 1389844_at                 | Fkbp4       | FK506 binding protein 4                                                                                  | -0.84              | 0.04627 |
| 1369022_at                 | Svop        | SV2 related protein                                                                                      | -0.82              | 0.02471 |
| 1371810_at                 | Copg        | coatamer protein complex, subunit gamma                                                                  | -0.81              | 0.01908 |
| 1388475_at                 | LOC313535   | ERI1 exoribonuclease family member 3                                                                     | -0.78              | 0.04743 |
| 1395405_at                 | Snx26       | sorting nexin 26                                                                                         | -0.76              | 0.00748 |
| 1381971_at                 | Sox18       | SRY (sex determining region Y)-box 18                                                                    | -0.76              | 0.04714 |
| 1386846_at                 | Rprd1a      | regulation of nuclear pre-mRNA domain containing 1A                                                      | -0.75              | 0.04245 |
| 1370982_at                 | Pygm        | phosphorylase, glycogen, muscle                                                                          | -0.75              | 0.04988 |
| 1391698_at                 | Mast1       | microtubule associated serine/threonine kinase 1                                                         | -0.75              | 0.00470 |
| 1371578_at                 | Prkaca      | protein kinase, cAMP-dependent, catalytic, alpha                                                         | -0.74              | 0.01829 |
| 1368117_at                 | Gphn        | gephyrin                                                                                                 | -0.72              | 0.04307 |
| 1371704_at                 | Ddx23       | DEAD (Asp-Glu-Ala-Asp) box polypeptide 23                                                                | -0.72              | 0.05000 |
| 1371979_at                 | Sreb2       | sterol regulatory element binding transcription factor 2                                                 | -0.72              | 0.00217 |
| 1380511_at                 | Parvb       | parvin, beta                                                                                             | -0.71              | 0.03011 |
| 1398270_at                 | Bmp2        | bone morphogenetic protein 2                                                                             | -0.70              | 0.02571 |
| 1368807_at                 | Rtn3        | reticulin 3                                                                                              | -0.69              | 0.04641 |
| 1372289_at                 | Slc25a12    | solute carrier family 25 (mitochondrial carrier, Aralar), member 12                                      | -0.67              | 0.01109 |
| 1368201_at                 | Npr1        | natriuretic peptide receptor A/guanylate cyclase A (atrionatriuretic peptide receptor A)                 | -0.67              | 0.03851 |
| 1389906_at                 | Fdft1       | farnesyl diphosphate farnesyl transferase 1                                                              | -0.67              | 0.00274 |
| 1387429_at                 | Adrbk1      | adrenergic, beta, receptor kinase 1                                                                      | -0.66              | 0.04318 |
| 1367959_a_at               | Sen1b       | sodium channel, voltage-gated, type I, beta                                                              | -0.65              | 0.02330 |
| 1370011_at                 | Ak1         | adenylate kinase 1                                                                                       | -0.65              | 0.02942 |
| 1372310_at                 | Isoc1       | isochorismatase domain containing 1                                                                      | -0.65              | 0.01190 |
| 1371606_at                 | Wdte1       | WD and tetrapeptide repeats 1                                                                            | -0.64              | 0.04264 |
| 1371497_at                 | Asb6        | ankyrin repeat and SOCS box-containing 6                                                                 | -0.64              | 0.00419 |
| 1373971_at                 | Lpcat4      | lysophosphatidylcholine acyltransferase 4                                                                | -0.64              | 0.00250 |
| 1387926_at                 | Sc5dl       | sterol-C5-desaturase (ERG3 delta-5-desaturase homolog, S. cerevisiae)-like                               | -0.64              | 0.01887 |
| 1378297_at                 | RGD1305725  | similar to chromosome 20 open reading frame 102                                                          | -0.63              | 0.04891 |
| 1387655_at                 | LOC683938   | similar to stromal cell derived factor receptor 1                                                        | -0.63              | 0.04891 |
| 1389540_at                 | LOC683475   | similar to IQ motif and Sec7 domain 2                                                                    | -0.63              | 0.02538 |
| 1395534_at                 | Ras10b      | RAS-like, family 10, member B                                                                            | -0.62              | 0.03636 |

| Probe ID   | Gene symbol | Gene full name                             | Log2 (fold change) | p Value |
|------------|-------------|--------------------------------------------|--------------------|---------|
| 1378535_at | Phf7        | PHD finger protein 7                       | -0.62              | 0.00977 |
| 1397806_at | LOC293494   | ino80 complex subunit E                    | -0.62              | 0.01151 |
| 1367649_at | Palm        | paralemmin                                 | -0.61              | 0.02135 |
| 1367993_at | Clip1       | CAP-GLY domain containing linker protein 1 | -0.61              | 0.02374 |
| 1385124_at | Trib2       | tribbles homolog 2 (Drosophila)            | -0.59              | 0.00985 |
| 1368352_at | Stx1b       | syntaxin 1B                                | -0.59              | 0.00847 |
| 1389064_at | Fem1c       | fem-1 homolog c (C. elegans)               | -0.59              | 0.01455 |
