# Supplementary material for: Molecular and Cellular Changes in the Lumbar Spinal Cord following Thoracic Injury: Regulation by Treadmill Locomotor Training
Source: PubMed Central journal article supplement (PMC3919755; doi:10.1371/journal.pone.0088215), 2014-02-10
Supplement: pone.0088215.s002.pdf [file pone.0088215.s002.pdf]

**Table S2. A list of genes that were differentially expressed only at 3-week time point**

| Probe ID                 | Gene symbol | Gene full name                                                                                       | Log2 (fold change) | p Value |
|--------------------------|-------------|------------------------------------------------------------------------------------------------------|--------------------|---------|
| <b>Upregulated genes</b> |             |                                                                                                      |                    |         |
| 1371193_at               | Tnfaip6     | tumor necrosis factor alpha induced protein 6                                                        | 2.91               | 0.02394 |
| 1379200_at               | RGD1563278  | DAZ interacting zinc finger protein 3                                                                | 2.49               | 0.00296 |
| 1369692_at               | Tnr         | tenascin R                                                                                           | 2.08               | 0.01208 |
| 1374730_at               | Tyrobp      | tyro protein tyrosine kinase binding protein                                                         | 2.07               | 0.03243 |
| 1369756_a_at             | Slc4a5      | solute carrier family 4, sodium bicarbonate cotransporter, member 5                                  | 1.99               | 0.04417 |
| 1371250_at               | Pf4         | platelet factor 4                                                                                    | 1.92               | 0.00927 |
| 1376823_at               | Fndc3a      | fibronectin type III domain containing 3a                                                            | 1.91               | 0.04421 |
| 1370946_at               | Nfix        | nuclear factor I/X (CCAAT-binding transcription factor)                                              | 1.89               | 0.04099 |
| 1379397_at               | Rora        | RAR-related orphan receptor A                                                                        | 1.88               | 0.00928 |
| 1367934_at               | Rpl39       | ribosomal protein L39                                                                                | 1.76               | 0.02017 |
| 1388185_at               | LOC683869   | similar to Retinoblastoma-like protein 1 (107 kDa retinoblastoma-associated protein) (PRB1) (P107)   | 1.71               | 0.04993 |
| 1385168_at               | RGD1306520  | similar to receptor-interacting factor 1                                                             | 1.53               | 0.04513 |
| 1385751_at               | Thbs2       | thrombospondin 2                                                                                     | 1.48               | 0.01937 |
| 1372404_at               | Rac2        | ras-related C3 botulinum toxin substrate 2 (rho family, small GTP binding protein Rac2)              | 1.46               | 0.00753 |
| 1386869_at               | LOC360902   | similar to actin, gamma 2, smooth muscle, enteric                                                    | 1.45               | 0.01126 |
| 1394125_at               | RGD1563410  | similar to put. type 5 nonmuscle actin                                                               | 1.45               | 0.01126 |
| 1371447_at               | Plac8       | placenta-specific 8                                                                                  | 1.45               | 0.02442 |
| 1383911_at               | Kdm4c       | lysine (K)-specific demethylase 4C                                                                   | 1.44               | 0.02333 |
| 1371106_at               | Itgb8       | integrin, beta 8                                                                                     | 1.43               | 0.02808 |
| 1390938_at               | Arhgap30    | rho GTPase activating protein 30                                                                     | 1.42               | 0.00963 |
| 1373884_at               | Kihl2       | kelch-like 2, Mayven (Drosophila)                                                                    | 1.41               | 0.03500 |
| 1373504_at               | LOC679819   | GL1 pathogenesis-related 2                                                                           | 1.41               | 0.02410 |
| 1368482_at               | Bcl2a1d     | b-cell leukemia/lymphoma 2 related protein A1d                                                       | 1.36               | 0.04885 |
| 1371015_at               | Mx1         | myxovirus (influenza virus) resistance 1                                                             | 1.36               | 0.00048 |
| 1383410_at               | Srp54a      | signal recognition particle 54a                                                                      | 1.34               | 0.01999 |
| 1384320_at               | Bai3        | brain-specific angiogenesis inhibitor 3                                                              | 1.31               | 0.04855 |
| 1370767_at               | Cox6c1      | cytochrome c oxidase subunit VIc-1                                                                   | 1.31               | 0.00696 |
| 1390782_at               | Clec14a     | C-type lectin domain family 14, member a                                                             | 1.31               | 0.04408 |
| 1393863_at               | Cd180       | cd180 molecule                                                                                       | 1.30               | 0.01662 |
| 1373195_at               | Fus         | fusion (involved in t(12;16) in malignant liposarcoma) (human)                                       | 1.28               | 0.01418 |
| 1374734_at               | LOC680254   | hypothetical protein LOC680254                                                                       | 1.23               | 0.03038 |
| 1388484_at               | Ube2c       | ubiquitin-conjugating enzyme E2C                                                                     | 1.21               | 0.02231 |
| 1390510_at               | Ms4a6b      | membrane-spanning 4-domains, subfamily A, member 6B                                                  | 1.18               | 0.02870 |
| 1391754_at               | Oas1i       | 2' -5' oligoadenylate synthetase II                                                                  | 1.17               | 0.03340 |
| 1371859_at               | Poldip3     | polymerase (DNA-directed), delta interacting protein 3                                               | 1.16               | 0.00218 |
| 1381757_at               | RGD1309501  | hypothetical LOC305552                                                                               | 1.15               | 0.03231 |
| 1368418_a_at             | Cp          | ceruloplasmin                                                                                        | 1.15               | 0.00244 |
| 1381758_at               | RGD1565672  | similar to MDM2 Binding protein                                                                      | 1.12               | 0.01732 |
| 1377642_at               | Cav2        | caveolin 2                                                                                           | 1.12               | 0.04826 |
| 1396803_at               | Thoc2       | THO complex 2                                                                                        | 1.09               | 0.03370 |
| 1396239_at               | RGD1566036  | similar to RIKEN cDNA 2310008H04                                                                     | 1.09               | 0.01726 |
| 1385434_at               | Ptger2      | prostaglandin E receptor 2 (subtype EP2)                                                             | 1.08               | 0.00560 |
| 1386913_at               | Pdpr        | podoplanin                                                                                           | 1.07               | 0.01952 |
| 1394144_at               | Tubb6       | tubulin, beta 6                                                                                      | 1.06               | 0.00314 |
| 1387995_a_at             | Ifitm3      | interferon induced transmembrane protein 3                                                           | 1.06               | 0.00281 |
| 1372703_at               | LOC689226   | similar to ubiquitin-conjugating enzyme E2R 2                                                        | 1.05               | 0.01019 |
| 1383747_at               | Ect2        | epithelial cell transforming sequence 2 oncogene                                                     | 1.05               | 0.03814 |
| 1382913_at               | Cttnbp2     | cortactin binding protein 2                                                                          | 1.04               | 0.00510 |
| 1379287_at               | RGD1565766  | hypothetical gene supported by BC088468; NM_001009712                                                | 1.04               | 0.04919 |
| 1373025_at               | Clqc        | complement component 1, q subcomponent, C chain                                                      | 1.03               | 0.00114 |
| 1398279_at               | Ttpv5       | transient receptor potential cation channel, subfamily V, member 5                                   | 1.02               | 0.00499 |
| 1396918_at               | LOC362852   | similar to ubiquitin conjugating enzyme E2                                                           | 1.00               | 0.00543 |
| 1378914_a_at             | LOC308990   | hypothetical protein LOC308990                                                                       | 1.00               | 0.01307 |
| 1370977_at               | Dpfl        | D4, zinc and double PHD fingers family 1                                                             | 0.99               | 0.01834 |
| 1371016_at               | LOC290071   | similar to RIKEN cDNA A430107P09 gene-like /// similar to RIKEN cDNA A430107P09 gene                 | 0.99               | 0.00683 |
| 1394678_at               | Fgd2        | FYVE, RhoGEF and PH domain containing 2                                                              | 0.98               | 0.04659 |
| 1373490_at               | Gmfg        | glia maturation factor, gamma                                                                        | 0.96               | 0.03901 |
| 1388906_at               | RGD1564930  | predicted similar to novel protein similar to Tensin Tns (predicted)                                 | 0.95               | 0.04029 |
| 1373401_at               | Tnc         | tenascin C                                                                                           | 0.94               | 0.01809 |
| 1393110_at               | Mpv17l      | MPV17 mitochondrial membrane protein-like                                                            | 0.93               | 0.01710 |
| 1394744_at               | Eef1g       | Eukaryotic translation elongation factor 1 gamma                                                     | 0.93               | 0.00067 |
| 1378338_at               | RGD1561004  | alport syndrome, mental retardation, midface hypoplasia and elliptocytosis chromosomal region gene 1 | 0.93               | 0.03967 |
| 1383863_at               | Lmo2        | LIM domain only 2                                                                                    | 0.92               | 0.02360 |
| 1383320_at               | Lck         | lymphocyte-specific protein tyrosine kinase                                                          | 0.92               | 0.01487 |
| 1381533_at               | Rnd1        | rho family GTPase 1                                                                                  | 0.91               | 0.04627 |
| 1368186_a_at             | Syk         | spleen tyrosine kinase                                                                               | 0.91               | 0.01985 |
| 1371660_at               | LOC682099   | similar to Juxtaposed with another zinc finger protein 1                                             | 0.91               | 0.00208 |
| 1371162_at               | Mrga10      | MAS-related GPR, member A10                                                                          | 0.90               | 0.01465 |
| 1375718_at               | LOC498525   | bm403207                                                                                             | 0.89               | 0.00824 |
| 1376704_a_at             | Ndnl2       | necdin-like 2                                                                                        | 0.89               | 0.02869 |
| 1383616_at               | Il10rb      | interleukin 10 receptor, beta                                                                        | 0.89               | 0.00712 |
| 1385724_at               | LOC680752   | coiled-coil domain containing 74A                                                                    | 0.89               | 0.04562 |
| 1392703_at               | Tbx4        | T-box 4                                                                                              | 0.88               | 0.04633 |
| 1372725_at               | LOC315883   | phospholipid scramblase 2                                                                            | 0.87               | 0.03304 |
| 1372827_at               | RGD1560149  | peptidylprolyl isomerase D-like 1                                                                    | 0.87               | 0.01169 |
| 1372641_at               | Alpk3       | alpha-kinase 3                                                                                       | 0.86               | 0.03662 |
| 1372809_at               | LOC290595   | hypothetical gene supported by AF152002                                                              | 0.86               | 0.00726 |
| 1376974_at               | Ttc7        | tetratricopeptide repeat domain 7                                                                    | 0.85               | 0.00438 |

| Probe ID     | Gene symbol | Gene full name                                                                              | Log2 (fold change) | p Value |
|--------------|-------------|---------------------------------------------------------------------------------------------|--------------------|---------|
| 1375847_at   | Nudt16      | nudix (nucleoside diphosphate linked moiety X)-type motif 16                                | 0.85               | 0.03311 |
| 1377080_at   | Nradd       | neurotrophin receptor associated death domain                                               | 0.84               | 0.03976 |
| 1376447_at   | RGD1565772  | similar to hypothetical protein A430110N23                                                  | 0.84               | 0.01177 |
| 1383925_at   | LOC298643   | migration and invasion inhibitory protein                                                   | 0.84               | 0.00212 |
| 1390641_at   | Zfp346      | zinc finger protein 346                                                                     | 0.83               | 0.01757 |
| 1385627_at   | LOC686871   | similar to B-cell leukemia/lymphoma 3                                                       | 0.81               | 0.02848 |
| 1385627_at   | LOC680611   | bcl3 B-cell CLL/lymphoma 3                                                                  | 0.81               | 0.02848 |
| 1367574_at   | Vim         | vimentin                                                                                    | 0.81               | 0.03826 |
| 1379315_at   | Rassf7      | ras association (RalGDS/AF-6) domain family (N-terminal) member 7                           | 0.81               | 0.00943 |
| 1393510_at   | Golsyn      | golgi-localized protein                                                                     | 0.81               | 0.00159 |
| 1399104_at   | Crebbp      | CREB binding protein                                                                        | 0.81               | 0.01083 |
| 1383647_a_at | Crb3        | crumbs homolog 3 (Drosophila)                                                               | 0.80               | 0.04472 |
| 1392662_at   | Cisd2       | CDGSH iron sulfur domain 2                                                                  | 0.80               | 0.04512 |
| 1396478_at   | Tmem164     | transmembrane protein 164                                                                   | 0.79               | 0.04547 |
| 1371777_at   | Pabpc4      | poly(A) binding protein, cytoplasmic 4                                                      | 0.79               | 0.00736 |
| 1375741_at   | Ccdc88b     | coiled-coil domain containing 88B                                                           | 0.79               | 0.00635 |
| 1384528_at   | Rai14       | retinoic acid induced 14                                                                    | 0.79               | 0.02043 |
| 1367844_at   | Gnai2       | guanine nucleotide binding protein (G protein), alpha inhibiting 2                          | 0.79               | 0.03517 |
| 1372672_at   | Qprt        | quinolinate phosphoribosyltransferase                                                       | 0.78               | 0.00045 |
| 1392466_at   | Tmem135     | transmembrane protein 135                                                                   | 0.77               | 0.03609 |
| 1393460_at   | Lrrc33      | leucine rich repeat containing 33                                                           | 0.77               | 0.03432 |
| 1377848_at   | Ccdc98      | coiled-coil domain containing 98                                                            | 0.76               | 0.03590 |
| 1370913_at   | Rsad2       | radical S-adenosyl methionine domain containing 2                                           | 0.76               | 0.01576 |
| 1380262_at   | Sgk2        | serum/glucocorticoid regulated kinase 2                                                     | 0.76               | 0.04691 |
| 1368429_at   | Taf9b       | TAF9B RNA polymerase II, TATA box binding protein (TBP)-associated factor                   | 0.75               | 0.03417 |
| 1369841_at   | Hspa2       | heat shock protein alpha 2                                                                  | 0.75               | 0.01776 |
| 1395404_at   | Fn3krp      | fructosamine-3-kinase-related protein                                                       | 0.75               | 0.04185 |
| 1371074_a_at | Mcm6        | minichromosome maintenance complex component 6                                              | 0.74               | 0.04006 |
| 1375633_at   | Clic1       | chloride intracellular channel 1                                                            | 0.73               | 0.03463 |
| 1398250_at   | Acot1       | acyl-CoA thioesterase 1                                                                     | 0.73               | 0.04288 |
| 1374204_at   | Wsb1        | WD repeat and SOCS box-containing 1                                                         | 0.73               | 0.04142 |
| 1382315_at   | Tsc22d4     | TSC22 domain family, member 4                                                               | 0.73               | 0.00227 |
| 1370892_at   | C4b         | complement component 4, gene 2 // complement component 4B (Chido blood group)               | 0.72               | 0.04977 |
| 1389686_at   | Prkx        | protein kinase, X-linked                                                                    | 0.72               | 0.00888 |
| 1389828_at   | Cebpd       | CCAAT/enhancer binding protein (C/EBP), delta                                               | 0.72               | 0.01852 |
| 1374540_at   | Cdca7       | cell division cycle associated 7                                                            | 0.72               | 0.00494 |
| 1379853_at   | Hspb11      | heat shock protein family B (small), member 11                                              | 0.71               | 0.00684 |
| 1389364_at   | Ndfip2      | Ned44 family interacting protein 2                                                          | 0.71               | 0.04793 |
| 1371550_at   | LOC686226   | similar to TSC22 domain family protein 4 (TSC22-related-inducible leucine zipper protein 2) | 0.71               | 0.03512 |
| 1368308_at   | Myc         | myelocytomatosis oncogene                                                                   | 0.70               | 0.02386 |
| 1389271_at   | LOC679921   | vasorin                                                                                     | 0.70               | 0.01754 |
| 1369161_at   | Abcb4       | ATP-binding cassette, sub-family B (MDR/TAP), member 4                                      | 0.70               | 0.00562 |
| 1382364_at   | RGD1310427  | similar to KIAA0090 protein                                                                 | 0.70               | 0.00050 |
| 1390088_at   | Nog         | noggin                                                                                      | 0.70               | 0.04369 |
| 1379914_at   | Klf11       | kruppel-like factor 11                                                                      | 0.70               | 0.02425 |
| 1367549_a_at | Ap3d1       | adaptor-related protein complex 3, delta 1 subunit                                          | 0.70               | 0.00450 |
| 1383940_at   | Nuf2        | NUF2, NDC80 kinetochore complex component, homolog (S. cerevisiae)                          | 0.69               | 0.03343 |
| 1385430_at   | Lims1       | LIM and senescent cell antigen-like domains 1                                               | 0.68               | 0.04999 |
| 1374401_at   | Snx2        | sorting nexin 2                                                                             | 0.67               | 0.01603 |
| 1378353_at   | Setdb1      | SET domain, bifurcated 1                                                                    | 0.67               | 0.00473 |
| 1390287_at   | Bin2        | bridging integrator 2                                                                       | 0.67               | 0.01688 |
| 1384714_x_at | RGD1561333  | similar to 60S ribosomal protein L8 // ribosomal protein L8                                 | 0.67               | 0.04153 |
| 1367800_at   | Plat        | plasminogen activator, tissue                                                               | 0.66               | 0.00192 |
| 1368970_at   | Cdh23       | cadherin 23 (otocadherin)                                                                   | 0.66               | 0.00395 |
| 1378127_at   | Cul2        | cullin 2                                                                                    | 0.66               | 0.01152 |
| 1371411_at   | Plxn2       | plexin B2                                                                                   | 0.66               | 0.03683 |
| 1371758_at   | Ufc1        | ubiquitin-fold modifier conjugating enzyme 1                                                | 0.66               | 0.04901 |
| 1384099_at   | Slc39a6     | solute carrier family 39 (zinc transporter), member 6                                       | 0.66               | 0.01167 |
| 1393724_at   | LOC362056   | spermatogenesis associated 1                                                                | 0.66               | 0.00142 |
| 1372640_at   | Pi16        | peptidase inhibitor 16                                                                      | 0.66               | 0.01815 |
| 1388755_at   | Sec23a      | sec23 homolog A (S. cerevisiae)                                                             | 0.65               | 0.04085 |
| 1368259_at   | Ptgs1       | prostaglandin-endoperoxide synthase 1                                                       | 0.65               | 0.02145 |
| 1370857_at   | Acta2       | smooth muscle alpha-actin                                                                   | 0.65               | 0.03860 |
| 1372548_at   | Cry2        | cryptochrome 2 (photolyase-like)                                                            | 0.65               | 0.00061 |
| 1373623_at   | Itpkc       | inositol 1,4,5-trisphosphate 3-kinase C                                                     | 0.65               | 0.02807 |
| 1372254_at   | Serping1    | serine (or cysteine) peptidase inhibitor, clade G, member 1                                 | 0.65               | 0.03990 |
| 1374055_at   | Erf         | ets2 repressor factor                                                                       | 0.65               | 0.02556 |
| 1375436_at   | Naprt1      | nicotinate phosphoribosyltransferase domain containing 1                                    | 0.64               | 0.00192 |
| 1379458_at   | Kihl14      | kelch-like 14 (Drosophila)                                                                  | 0.64               | 0.03486 |
| 1367871_at   | Cyp2e1      | cytochrome P450, family 2, subfamily e, polypeptide 1                                       | 0.64               | 0.01934 |
| 1385333_at   | LOC688299   | similar to apoptosis-associated tyrosine kinase                                             | 0.64               | 0.01980 |
| 1385333_at   | LOC690853   | apoptosis-associated tyrosine kinase                                                        | 0.64               | 0.01980 |
| 1373625_at   | Shmt1       | serine hydroxymethyltransferase 1 (soluble)                                                 | 0.64               | 0.01600 |
| 1388496_at   | Flnc        | filamin C, gamma                                                                            | 0.64               | 0.02826 |
| 1395311_at   | Icmt        | isoprenylcysteine carboxyl methyltransferase                                                | 0.64               | 0.01974 |
| 1368148_at   | Ngfr        | nerve growth factor receptor (TNFR superfamily, member 16)                                  | 0.62               | 0.01037 |
| 1367832_at   | Lyp1a1      | lysophospholipase 1                                                                         | 0.62               | 0.04981 |
| 1369511_at   | Ednra       | endothelin receptor type A                                                                  | 0.61               | 0.02946 |
| 1382104_at   | Wdr33       | WD repeat domain 33                                                                         | 0.61               | 0.00060 |
| 1390933_a_at | Rg9mtd3     | RNA (guanine-9-) methyltransferase domain containing 3                                      | 0.61               | 0.00022 |
| 1371499_at   | Cd9         | cd9 molecule                                                                                | 0.61               | 0.00179 |

| Probe ID                   | Gene symbol | Gene full name                                                                        | Log2 (fold change) | p Value |
|----------------------------|-------------|---------------------------------------------------------------------------------------|--------------------|---------|
| 1374537_at                 | Chsy1       | chondroitin sulfate synthase 1                                                        | 0.60               | 0.01798 |
| 1387546_at                 | LOC502603   | serine/arginine-rich splicing factor 11                                               | 0.60               | 0.00186 |
| 1377626_at                 | LOC690768   | hypothetical protein LOC690768                                                        | 0.59               | 0.00657 |
| 1387272_at                 | Alpk1       | alpha-kinase 1                                                                        | 0.59               | 0.02031 |
| 1387889_at                 | Folr1       | folate receptor 1 (adult)                                                             | 0.59               | 0.00247 |
| 1374452_at                 | Pde9a       | phosphodiesterase 9A                                                                  | 0.59               | 0.01891 |
| 1377984_at                 | Itpkb       | inositol 1,4,5-trisphosphate 3-kinase B                                               | 0.59               | 0.03313 |
| 1383671_at                 | Adam9       | ADAM metallopeptidase domain 9 (meltrin gamma)                                        | 0.59               | 0.03313 |
| <b>Downregulated genes</b> |             |                                                                                       |                    |         |
| 1394921_at                 | Prkaa1      | protein kinase, AMP-activated, alpha 1 catalytic subunit                              | -2.00              | 0.01959 |
| 1384971_at                 | Depdc6      | DEP domain containing 6                                                               | -1.98              | 0.00285 |
| 1368116_a_at               | Rps6kb1     | ribosomal protein S6 kinase, 70kDa, polypeptide 1                                     | -1.77              | 0.01475 |
| 1377061_at                 | Rics        | rho GTPase-activating protein                                                         | -1.59              | 0.00107 |
| 1392133_at                 | Mapk1ip11   | mitogen-activated protein kinase 1 interacting protein 1-like                         | -1.52              | 0.04554 |
| 1385017_at                 | LOC691610   | zinc finger protein 770                                                               | -1.51              | 0.00359 |
| 1369860_a_at               | Htr2c       | 5-hydroxytryptamine (serotonin) receptor 2C                                           | -1.47              | 0.03263 |
| 1369248_a_at               | Xiap        | X-linked inhibitor of apoptosis                                                       | -1.36              | 0.02584 |
| 1387374_at                 | Tcf12       | transcription factor 12                                                               | -1.34              | 0.02482 |
| 1387716_at                 | Utrn        | utrophin                                                                              | -1.34              | 0.03705 |
| 1369540_at                 | Necab1      | N-terminal EF-hand calcium binding protein 1                                          | -1.33              | 0.01087 |
| 1393910_at                 | Fam13a1     | family with sequence similarity 13, member A1                                         | -1.33              | 0.02288 |
| 1388218_at                 | Ldlr        | low density lipoprotein receptor                                                      | -1.31              | 0.03026 |
| 1387737_at                 | Mat2a       | methionine adenosyltransferase II, alpha                                              | -1.26              | 0.04118 |
| 1394049_at                 | Dcun1d1     | DCN1, defective in cullin neddylation 1, domain containing 1 (S. cerevisiae)          | -1.22              | 0.00848 |
| 1369903_at                 | Gabrb3      | gamma-aminobutyric acid (GABA) A receptor, beta 3                                     | -1.21              | 0.00482 |
| 1367728_at                 | Tsn         | translin                                                                              | -1.21              | 0.02869 |
| 1372103_at                 | Dnaja4      | dnaJ (Hsp40) homolog, subfamily A, member 4                                           | -1.21              | 0.02946 |
| 1393136_at                 | LOC313618   | transmembrane protein 57                                                              | -1.19              | 0.03175 |
| 1384797_at                 | Atl3        | atlastin GTPase 3                                                                     | -1.18              | 0.03678 |
| 1369332_a_at               | Rims1       | regulating synaptic membrane exocytosis 1                                             | -1.16              | 0.02805 |
| 1370991_at                 | Cml3        | camello-like 3                                                                        | -1.15              | 0.02183 |
| 1388748_at                 | Laptm4a     | lysosomal protein transmembrane 4 alpha                                               | -1.14              | 0.00000 |
| 1371706_at                 | LOC683605   | similar to serologically defined colon cancer antigen 3 isoform 1                     | -1.13              | 0.05000 |
| 1384106_at                 | Sgms1       | sphingomyelin synthase 1                                                              | -1.12              | 0.00812 |
| 1369421_at                 | Top1        | topoisomerase (DNA) I                                                                 | -1.12              | 0.00933 |
| 1395600_at                 | LOC498404   | coiled-coil domain containing 117                                                     | -1.12              | 0.04388 |
| 1388171_at                 | Cdk7        | cyclin-dependent kinase 7                                                             | -1.10              | 0.00038 |
| 1390179_at                 | Ankrd52     | ankyrin repeat domain 52                                                              | -1.09              | 0.03991 |
| 1379248_at                 | Prpc        | prolylcarboxypeptidase (angiotensinase C)                                             | -1.08              | 0.00584 |
| 1370833_at                 | Pex5l       | peroxisomal biogenesis factor 5-like                                                  | -1.08              | 0.01238 |
| 1382306_at                 | Arlh1       | ariadne ubiquitin-conjugating enzyme E2 binding protein homolog 1 (Drosophila)        | -1.07              | 0.00268 |
| 1387929_at                 | Pmf31       | PMF32 protein                                                                         | -1.07              | 0.01813 |
| 1398458_at                 | RGD1307284  | lysine deficient protein kinase 2                                                     | -1.04              | 0.00003 |
| 1395344_at                 | Mtmr1       | myotubularin related protein 1                                                        | -1.03              | 0.02156 |
| 1393306_at                 | Cul5        | Cullin 5                                                                              | -1.02              | 0.00363 |
| 1387824_at                 | Sfrs12      | splicing factor, arginine/serine-rich 12                                              | -1.01              | 0.00274 |
| 1377643_at                 | Hoxd10      | homeo box D10                                                                         | -1.01              | 0.02313 |
| 1387301_at                 | Fgf1        | fibroblast growth factor 1                                                            | -1.01              | 0.04044 |
| 1393016_s_at               | Sec31       | SEC3-like 1 (S. cerevisiae)                                                           | -1.00              | 0.01256 |
| 1387137_at                 | Comp        | cartilage oligomeric matrix protein                                                   | -0.99              | 0.04265 |
| 1369265_at                 | Senp2       | Sumo1/sentrin/SMT3 specific peptidase 2                                               | -0.97              | 0.04040 |
| 1370116_at                 | Sept3       | septin 3                                                                              | -0.97              | 0.01051 |
| 1386023_at                 | Lgi1        | leucine-rich, glioma inactivated 1 /// leucine-rich glioma-inactivated protein 1-like | -0.96              | 0.00570 |
| 1370520_at                 | LOC257650   | hippyragranin                                                                         | -0.96              | 0.01273 |
| 1387204_at                 | Negr1       | neuronal growth regulator 1                                                           | -0.95              | 0.02301 |
| 1369044_a_at               | Pde4b       | phosphodiesterase 4B, cAMP specific                                                   | -0.95              | 0.01430 |
| 1387529_a_at               | Tagln3      | transgelin 3                                                                          | -0.95              | 0.00004 |
| 1368889_at                 | Vti1a       | vesicle transport through interaction with t-SNAREs homolog 1A (yeast)                | -0.95              | 0.03709 |
| 1379778_at                 | DMXL1       | Dmx-like 1                                                                            | -0.95              | 0.04442 |
| 1375627_at                 | Akirin2     | akirin 2                                                                              | -0.94              | 0.04917 |
| 1382171_at                 | LOC499624   | TSC22 domain family, member 2                                                         | -0.94              | 0.03081 |
| 1376195_at                 | Spin1       | spindlin 1                                                                            | -0.94              | 0.02230 |
| 1396131_at                 | Fam134c     | family with sequence similarity 134, member C                                         | -0.94              | 0.01194 |
| 1368573_at                 | Kpnb1       | karyopherin (importin) beta 1                                                         | -0.93              | 0.04213 |
| 1386685_at                 | Sacs        | spastic ataxia of Charlevoix-Saguenay (sacsin)                                        | -0.92              | 0.01311 |
| 1388022_a_at               | Dnm1        | dynamin 1-like                                                                        | -0.92              | 0.00877 |
| 1368438_at                 | Pde10a      | phosphodiesterase 10A                                                                 | -0.92              | 0.03902 |
| 1367996_a_at               | Lphn1       | latrophilin 1                                                                         | -0.91              | 0.00629 |
| 1377025_at                 | Kif3a       | kinesin family member 3a                                                              | -0.89              | 0.04134 |
| 1375015_at                 | LOC317546   | similar to TAK1-binding protein 3 isoform 1                                           | -0.89              | 0.04637 |
| 1387807_at                 | Pafah1b1    | platelet-activating factor acetylhydrolase, isoform 1b, subunit 1                     | -0.88              | 0.00180 |
| 1370016_at                 | Nell2       | NEL-like 2 (chicken)                                                                  | -0.88              | 0.04451 |
| 1381098_at                 | LOC690243   | hypothetical protein LOC690243                                                        | -0.88              | 0.01710 |
| 1372977_at                 | Map4k5      | mitogen-activated protein kinase kinase kinase 5                                      | -0.88              | 0.03309 |
| 1378096_at                 | Kif5b       | kinesin family member 5B                                                              | -0.87              | 0.02917 |
| 1369041_at                 | Nlgn1       | neuroligin 1                                                                          | -0.87              | 0.02291 |
| 1371800_at                 | Phc3        | polyhomeotic homolog 2 (Drosophila)                                                   | -0.86              | 0.03311 |
| 1388143_at                 | Col18a1     | collagen, type XVIII, alpha 1                                                         | -0.86              | 0.00323 |
| 1375978_at                 | Fcho1       | FCH domain only 1                                                                     | -0.85              | 0.02250 |
| 1385835_at                 | Plxdc1      | plexin domain containing 1                                                            | -0.85              | 0.00177 |
| 1373913_at                 | Pnpt1       | polyribonucleotide nucleotidyltransferase 1                                           | -0.84              | 0.01486 |

| Probe ID     | Gene symbol | Gene full name                                                                | Log2 (fold change) | p Value |
|--------------|-------------|-------------------------------------------------------------------------------|--------------------|---------|
| 1375616_at   | Apa2        | Amyloid beta (A4) precursor protein-binding, family A, member 2               | -0.83              | 0.03022 |
| 1375226_at   | Tbc1d10b    | TBC1 domain family, member 10b                                                | -0.83              | 0.01106 |
| 1368369_at   | Pnoc        | prepronociceptin                                                              | -0.83              | 0.00758 |
| 1369720_at   | Myo1b       | myosin Ib                                                                     | -0.82              | 0.02531 |
| 1382451_at   | Hebp2       | heme binding protein 2                                                        | -0.82              | 0.01222 |
| 1397824_at   | RGD1562407  | similar to WAC                                                                | -0.82              | 0.03809 |
| 1384002_at   | LOC361929   | ATPase, class VI, type 11B                                                    | -0.82              | 0.03022 |
| 1386897_at   | LOC500378   | chromatin target of PRMT1                                                     | -0.81              | 0.03586 |
| 1374521_at   | Pcgf3       | polycomb group ring finger 3                                                  | -0.80              | 0.00238 |
| 1395850_at   | Pus3        | pseudouridylylate synthase 3                                                  | -0.80              | 0.03211 |
| 1379612_at   | Mapk8       | mitogen-activated protein kinase 8                                            | -0.80              | 0.02826 |
| 1384205_at   | Ngly1       | N-glycanase 1                                                                 | -0.80              | 0.00304 |
| 1389032_at   | Meoln1      | mucolin 1                                                                     | -0.80              | 0.01838 |
| 1388274_at   | Bmyc        | brain expressed myelocytomatosis oncogene                                     | -0.79              | 0.04070 |
| 1391016_at   | LOC690654   | tryptophanyl tRNA synthetase 2 (mitochondrial)                                | -0.79              | 0.00324 |
| 1391619_at   | Bhlhb9      | basic helix-loop-helix domain containing, class B, 9                          | -0.79              | 0.03423 |
| 1387224_at   | Dgkb        | diacylglycerol kinase, beta                                                   | -0.79              | 0.01798 |
| 1369693_a_at | Slc1a2      | solute carrier family 1 (glial high affinity glutamate transporter), member 2 | -0.79              | 0.04256 |
| 1370081_a_at | Vegfa       | vascular endothelial growth factor A                                          | -0.78              | 0.02115 |
| 1384745_at   | Piwil2      | piwi-like 2 (Drosophila)                                                      | -0.78              | 0.02224 |
| 1390455_at   | Abhd2       | abhydrolase domain containing 2                                               | -0.78              | 0.04928 |
| 1369024_at   | Rabep2      | rabaptin, RAB GTPase binding effector protein 2                               | -0.78              | 0.01616 |
| 1375545_at   | Rbm9        | RNA binding motif protein 9                                                   | -0.78              | 0.00509 |
| 1382366_at   | Pik3cb      | phosphoinositide-3-kinase, catalytic, beta polypeptide                        | -0.78              | 0.04318 |
| 1368615_a_at | Slc18a3     | solute carrier family 18 (vesicular acetylcholine), member 3                  | -0.78              | 0.02197 |
| 1369687_at   | Kcnab3      | potassium voltage-gated channel, shaker-related subfamily, beta member 3      | -0.76              | 0.03811 |
| 1369820_at   | Mcf2l       | MCF.2 cell line derived transforming sequence-like                            | -0.76              | 0.02718 |
| 1377750_at   | Arhgef3     | rho guanine nucleotide exchange factor (GEF) 3                                | -0.75              | 0.01941 |
| 1377806_at   | Vezf1       | vascular endothelial zinc finger 1                                            | -0.75              | 0.00094 |
| 1387837_at   | Apc         | adenomatous polyposis coli                                                    | -0.75              | 0.03805 |
| 1393555_at   | Hsp90ab1    | heat shock protein 90kDa alpha (cytosolic), class B member 1                  | -0.75              | 0.00067 |
| 1388738_at   | Atrn1       | Attractin like 1                                                              | -0.74              | 0.04906 |
| 1367656_at   | Psb7        | proteasome (prosome, macropain) subunit, beta type 7                          | -0.74              | 0.03573 |
| 1375245_at   | LOC308398   | protein phosphatase 1, regulatory subunit 37                                  | -0.73              | 0.00797 |
| 1394923_at   | LOC683559   | similar to nuclear receptor interacting protein 2                             | -0.73              | 0.01139 |
| 1395988_at   | Zdhc22      | zinc finger, DHHC-type containing 22                                          | -0.73              | 0.00837 |
| 1373993_at   | LOC686858   | similar to small nuclear RNA activating complex, polypeptide 5                | -0.73              | 0.03192 |
| 1393236_at   | RioK3       | RIO kinase 3 (yeast)                                                          | -0.73              | 0.00947 |
| 1387563_at   | Pgr         | progesterone receptor                                                         | -0.73              | 0.01073 |
| 1391693_at   | Atp8a1      | ATPase, Class I, type 8A, member 1                                            | -0.72              | 0.00587 |
| 1379558_at   | LOC680222   | similar to zinc finger protein 748 isoform 2                                  | -0.71              | 0.00211 |
| 1389646_at   | Cdc23       | cdc23 (cell division cycle 23, yeast, homolog)                                | -0.71              | 0.01061 |
| 1396919_at   | Wnk1        | WNK lysine deficient protein kinase 1                                         | -0.71              | 0.00531 |
| 1371317_at   | LMO1        | LIM domain only 1                                                             | -0.70              | 0.04124 |
| 1377288_at   | Hsf4        | heat shock transcription factor 4                                             | -0.70              | 0.04045 |
| 1374637_at   | Tmco6       | transmembrane and coiled-coil domains 6                                       | -0.70              | 0.02520 |
| 1383326_a_at | Pdcd4       | programmed cell death 4                                                       | -0.70              | 0.04120 |
| 1377582_at   | Tox3        | TOX high mobility group box family member 3                                   | -0.70              | 0.03290 |
| 1384879_at   | Trpt1       | tRNA phosphotransferase 1                                                     | -0.70              | 0.03907 |
| 1386253_at   | Med4        | mediator complex subunit 4                                                    | -0.69              | 0.00226 |
| 1373045_at   | Kctd13      | potassium channel tetramerisation domain containing 13                        | -0.69              | 0.02235 |
| 1368177_at   | Acsl3       | acyl-CoA synthetase long-chain family member 3                                | -0.69              | 0.03584 |
| 1367796_at   | Mgat1       | mannosyl (alpha-1,3-)-glycoprotein beta-1,2-N-acetylglucosaminyltransferase   | -0.69              | 0.00830 |
| 1375305_at   | RGD1563912  | small nucleolar RNA host gene 11 (non-protein coding)                         | -0.69              | 0.00858 |
| 1374642_at   | Zfp64       | zinc finger protein 64                                                        | -0.68              | 0.04765 |
| 1388750_at   | Tfrc        | transferrin receptor                                                          | -0.68              | 0.00065 |
| 1390976_at   | Lynx1       | Ly6/neurotoxin 1                                                              | -0.68              | 0.01879 |
| 1387435_at   | St8sia3     | ST8 alpha-N-acetylneuraminide alpha-2,8-sialyltransferase 3                   | -0.68              | 0.01910 |
| 1392755_at   | Lrrc8c      | leucine rich repeat containing 8 family, member C                             | -0.68              | 0.03399 |
| 1370757_at   | Cacng3      | calcium channel, voltage-dependent, gamma subunit 3                           | -0.68              | 0.02102 |
| 1393363_at   | LOC305913   | zinc finger, MYM-type 2                                                       | -0.68              | 0.02175 |
| 1368421_at   | Ptpn5       | protein tyrosine phosphatase, non-receptor type 5                             | -0.67              | 0.01549 |
| 1370112_at   | Pten        | phosphatase and tensin homolog                                                | -0.67              | 0.01603 |
| 1369680_at   | Slc2a13     | solute carrier family 2 (facilitated glucose transporter), member 13          | -0.67              | 0.03371 |
| 1389865_at   | Toe1        | target of EGR1, member 1 (nuclear)                                            | -0.67              | 0.01512 |
| 1373542_at   | Sphk2       | sphingosine kinase 2                                                          | -0.66              | 0.03857 |
| 1388761_at   | Hdac1       | histone deacetylase 1                                                         | -0.66              | 0.01774 |
| 1389037_at   | Rit1        | Ras-like without CAAX 1                                                       | -0.66              | 0.04310 |
| 1370535_at   | Myt1l       | myelin transcription factor 1-like                                            | -0.66              | 0.01021 |
| 1383608_at   | Arrdc2      | arrestin domain containing 2                                                  | -0.66              | 0.01961 |
| 1368026_at   | Hdgfrp2     | hepatoma-derived growth factor, related protein 2                             | -0.66              | 0.00168 |
| 1385229_at   | Pcdh20      | protocadherin 20                                                              | -0.66              | 0.02724 |
| 1377696_at   | Mest        | mesoderm specific transcript homolog (mouse)                                  | -0.66              | 0.01578 |
| 1372506_at   | Psme3       | proteasome (prosome, macropain) activator subunit 3                           | -0.66              | 0.00616 |
| 1373061_at   | Snx17       | sorting nexin 17                                                              | -0.65              | 0.02691 |
| 1386279_at   | Stard4      | STAR-related lipid transfer (START) domain containing 4                       | -0.65              | 0.01282 |
| 1387873_at   | Wfdc1       | WAP four-disulfide core domain 1                                              | -0.65              | 0.00182 |
| 1368082_at   | Slc4a2      | solute carrier family 4 (anion exchanger), member 2                           | -0.65              | 0.02171 |
| 1370824_at   | Slc38a3     | solute carrier family 38, member 3                                            | -0.65              | 0.00507 |
| 1374568_at   | RGD1309492  | similar to mKIAA1737 protein                                                  | -0.65              | 0.03285 |
| 1386918_a_at | Sigmar1     | sigma non-opioid intracellular receptor 1                                     | -0.65              | 0.00329 |

| Probe ID     |            |                                                                                                | Log2<br>(fold change) | p Value |
|--------------|------------|------------------------------------------------------------------------------------------------|-----------------------|---------|
| 1373075_at   | RGD1560888 | similar to Cell division protein kinase 8 (Protein kinase K35)                                 | -0.65                 | 0.00411 |
| 1387103_s_at | Slc25a14   | solute carrier family 25 (mitochondrial carrier, brain), member 14                             | -0.65                 | 0.04811 |
| 1368621_at   | Aqp9       | aquaporin 9                                                                                    | -0.64                 | 0.02930 |
| 1369269_at   | Galnt1     | UDP-N-acetyl-alpha-D-galactosamine:polypeptide N-acetylgalactosaminyltransferase 1 (GalNAc-T1) | -0.64                 | 0.01425 |
| 1389167_at   | Mapkap1    | mitogen-activated protein kinase associated protein 1                                          | -0.64                 | 0.00520 |
| 1385218_at   | Noc3l      | nucleolar complex associated 3 homolog (S. cerevisiae)                                         | -0.64                 | 0.04356 |
| 1370100_at   | Pik3r2     | phosphoinositide-3-kinase, regulatory subunit 2 (beta)                                         | -0.64                 | 0.02661 |
| 1371060_at   | Trim23     | tripartite motif-containing 23                                                                 | -0.64                 | 0.04303 |
| 1371126_x_at | RGD1305094 | similar to CG2662-PA                                                                           | -0.63                 | 0.02234 |
| 1368922_at   | Ece1l      | endothelin converting enzyme-like 1                                                            | -0.63                 | 0.04031 |
| 1374470_at   | Dhx57      | DEAH (Asp-Glu-Ala-Asp/His) box polypeptide 57                                                  | -0.63                 | 0.01705 |
| 1374640_at   | Them4      | thioesterase superfamily member 4                                                              | -0.63                 | 0.00645 |
| 1376192_at   | Nat9       | N-acetyltransferase 9 (GCN5-related, putative)                                                 | -0.63                 | 0.00547 |
| 1372527_at   | Rtn2       | reticulon 2                                                                                    | -0.63                 | 0.01577 |
| 1372900_at   | Pigt       | phosphatidylinositol glycan anchor biosynthesis, class T                                       | -0.63                 | 0.03633 |
| 1379309_at   | Tb11xr1    | transducin (beta)-like 1 X-linked receptor 1                                                   | -0.63                 | 0.02315 |
| 1388503_at   | Eid1       | EP300 interacting inhibitor of differentiation 1                                               | -0.63                 | 0.04234 |
| 1388953_at   | Gnl3       | guanine nucleotide binding protein-like 3 (nucleolar)                                          | -0.63                 | 0.00951 |
| 1374626_at   | Lrg1       | leucine-rich alpha-2-glycoprotein 1                                                            | -0.63                 | 0.04426 |
| 1376408_at   | LOC499339  | hypothetical protein LOC499339                                                                 | -0.62                 | 0.00701 |
| 1384903_at   | Gpt2       | glutamic pyruvate transaminase (alanine aminotransferase) 2                                    | -0.62                 | 0.03375 |
| 1378506_at   | Pik3c2a    | phosphoinositide-3-kinase, class 2, alpha polypeptide                                          | -0.62                 | 0.04098 |
| 1382386_at   | Lmbr1      | limb region 1 homolog (mouse)                                                                  | -0.62                 | 0.00078 |
| 1368439_at   | Sox10      | SRY (sex determining region Y)-box 10                                                          | -0.62                 | 0.03760 |
| 1383867_at   | Eif5a2     | eukaryotic translation initiation factor 5A2                                                   | -0.62                 | 0.00750 |
| 1372536_at   | Cabc1      | chaperone, ABC1 activity of bc1 complex homolog (S. pombe)                                     | -0.62                 | 0.02433 |
| 1370490_at   | Pcdhb12    | protocadherin beta 12                                                                          | -0.62                 | 0.01867 |
| 1395464_at   | RGD1311154 | potassium channel tetramerization domain containing 17                                         | -0.62                 | 0.00367 |
| 1388697_at   | Inpp5a     | inositol polyphosphate-5-phosphatase A                                                         | -0.62                 | 0.01424 |
| 1393565_at   | RGD1563441 | similar to RIKEN cDNA A030009H04                                                               | -0.61                 | 0.04674 |
| 1396462_at   | Vps4a      | vacuolar protein sorting 4 homolog A (S. cerevisiae)                                           | -0.61                 | 0.03118 |
| 1374323_at   | Bccip      | BRCA2 and CDKN1A interacting protein                                                           | -0.61                 | 0.01895 |
| 1373498_at   | Vps11      | vacuolar protein sorting 11 homolog (S. cerevisiae)                                            | -0.61                 | 0.02517 |
| 1389377_at   | Insig2     | insulin induced gene 2                                                                         | -0.61                 | 0.01780 |
| 1395066_at   | Nol4       | nucleolar protein 4                                                                            | -0.61                 | 0.04471 |
| 1367980_at   | Rabep1     | rabaptin, RAB GTPase binding effector protein 1                                                | -0.61                 | 0.04047 |
| 1370954_at   | P4ha1      | prolyl 4-hydroxylase, alpha polypeptide I                                                      | -0.60                 | 0.02564 |
| 1388019_at   | Odf2       | outer dense fiber of sperm tails 2                                                             | -0.60                 | 0.03901 |
| 1396052_at   | Dhx8       | DEAH (Asp-Glu-Ala-His) box polypeptide 8                                                       | -0.60                 | 0.00391 |
| 1375398_at   | Tmem163    | transmembrane protein 163                                                                      | -0.60                 | 0.00767 |
| 1384445_at   | LOC298442  | coiled-coil domain containing 163                                                              | -0.60                 | 0.02437 |
| 1376607_a_at | RGD1310414 | similar to hypothetical protein FLJ23263                                                       | -0.60                 | 0.03785 |
| 1382251_at   | Kpna1      | karyopherin alpha 1                                                                            | -0.60                 | 0.04425 |
| 1381279_at   | Ripk2      | receptor-interacting serine-threonine kinase 2                                                 | -0.60                 | 0.01095 |
| 1387801_at   | Ppp6c      | protein phosphatase 6, catalytic subunit                                                       | -0.59                 | 0.03892 |
| 1369562_at   | Hpcal1     | hippocalcin-like 1                                                                             | -0.59                 | 0.03476 |
| 1372228_at   | Asmtl      | acetylserotonin O-methyltransferase-like                                                       | -0.59                 | 0.00921 |
| 1369213_at   | L1cam      | L1 cell adhesion molecule                                                                      | -0.59                 | 0.03084 |
| 1378116_at   | Zbtb45     | zinc finger and BTB domain containing 45                                                       | -0.59                 | 0.03166 |
| 1384423_at   | LOC365090  | similar to 5-nucleotidase, cytosolic II                                                        | -0.59                 | 0.03230 |
| 1374152_at   | Wdr46      | WD repeat domain 46                                                                            | -0.59                 | 0.03593 |
| 1371585_at   | Gspt1      | G1 to S phase transition 1                                                                     | -0.59                 | 0.04259 |
| 1387979_at   | Golgb1     | golgi autoantigen, golgin subfamily b, macrogolgin 1                                           | -0.59                 | 0.00603 |
| 1390945_at   | Znf292     | zinc finger protein 292                                                                        | -0.59                 | 0.02462 |
