# Supplementary material for: Molecular and Cellular Changes in the Lumbar Spinal Cord following Thoracic Injury: Regulation by Treadmill Locomotor Training
Source: PubMed Central journal article supplement (PMC3919755; doi:10.1371/journal.pone.0088215), 2014-02-10
Supplement: pone.0088215.s003.pdf [file pone.0088215.s003.pdf]

**Table S3. A list of genes that were differentially expressed at both 1- and 3-week time point**

| Probe ID                 | Gene symbol | Gene full name                                                                           | 1W Log2 (fold change) | p Value | 3W Log2 (fold change) | p Value |
|--------------------------|-------------|------------------------------------------------------------------------------------------|-----------------------|---------|-----------------------|---------|
| <b>Upregulated genes</b> |             |                                                                                          |                       |         |                       |         |
| 1386879_at               | Lgals3      | lectin, galactoside-binding, soluble, 3                                                  | 2.53                  | 0.01401 | 3.40                  | 0.00076 |
| 1368000_at               | C3          | complement component 3                                                                   | 2.25                  | 0.02035 | 1.64                  | 0.01661 |
| 1393682_at               | Gpr34       | G protein-coupled receptor 34                                                            | 2.24                  | 0.01051 | 2.57                  | 0.00230 |
| 1375010_at               | Cd68        | cd68 molecule                                                                            | 2.20                  | 0.04382 | 2.61                  | 0.01059 |
| 1374367_at               | Grxcr1      | glutaredoxin, cysteine rich 1                                                            | 2.17                  | 0.00856 | 1.84                  | 0.00606 |
| 1368558_s_at             | Aif1        | allograft inflammatory factor 1                                                          | 2.13                  | 0.01066 | 1.73                  | 0.02598 |
| 1368187_at               | Gpnmb       | glycoprotein (transmembrane) nmb                                                         | 2.13                  | 0.03007 | 3.56                  | 0.00090 |
| 1367712_at               | Timp1       | TIMP metalloproteinase inhibitor 1                                                       | 2.11                  | 0.01815 | 1.87                  | 0.00398 |
| 1393280_at               | Ly86        | lymphocyte antigen 86                                                                    | 2.03                  | 0.00518 | 1.34                  | 0.00534 |
| 1390687_at               | Plek        | pleckstrin                                                                               | 1.84                  | 0.00961 | 1.70                  | 0.00636 |
| 1368382_at               | S100a3      | s100 calcium binding protein A3                                                          | 1.76                  | 0.02629 | 1.84                  | 0.03418 |
| 1389553_at               | Clec4a3     | C-type lectin domain family 4, member a3                                                 | 1.75                  | 0.00867 | 1.39                  | 0.04559 |
| 1387029_at               | Cfh         | complement factor H                                                                      | 1.74                  | 0.00014 | 1.88                  | 0.02218 |
| 1388271_at               | LOC689415   | metallothionein 2A                                                                       | 1.74                  | 0.03042 | 1.88                  | 0.00091 |
| 1390798_at               | Ptprc       | protein tyrosine phosphatase, receptor type, C                                           | 1.73                  | 0.01557 | 1.14                  | 0.03096 |
| 1386936_at               | Grifin      | galectin-related inter-fiber protein                                                     | 1.73                  | 0.00853 | 1.94                  | 0.02674 |
| 1393641_at               | Blnk        | b-cell linker                                                                            | 1.72                  | 0.04888 | 1.60                  | 0.00180 |
| 1373412_at               | LOC295635   | similar to 5-nucleotidase, cytosolic II                                                  | 1.68                  | 0.02667 | 1.13                  | 0.03131 |
| 1378418_at               | Tifab       | TRAF-interacting protein with forkhead-associated domain, family member B                | 1.66                  | 0.01154 | 1.16                  | 0.03754 |
| 1386009_at               | Csf3r       | colony stimulating factor 3 receptor (granulocyte)                                       | 1.63                  | 0.00609 | 1.30                  | 0.00327 |
| 1373504_at               | Glipr1      | GLI pathogenesis-related 1                                                               | 1.61                  | 0.02282 | 1.54                  | 0.00155 |
| 1388689_at               | LOC682245   | similar to Acylphosphatase, muscle type isozyme (Acylphosphate phosphohydrolase)         | 1.61                  | 0.02475 | 2.61                  | 0.03861 |
| 1370080_at               | Hmox1       | heme oxygenase (decycling) 1                                                             | 1.59                  | 0.04623 | 1.06                  | 0.02284 |
| 1379766_at               | Sla         | Src-like adaptor                                                                         | 1.53                  | 0.03350 | 1.20                  | 0.00452 |
| 1377153_a_at             | Klhl6       | kelch-like 6 (Drosophila)                                                                | 1.53                  | 0.01662 | 1.05                  | 0.01206 |
| 1394673_at               | LOC687856   | similar to Myeloid cell surface antigen CD33 precursor (Siglec-3)                        | 1.51                  | 0.01933 | 1.60                  | 0.00821 |
| 1368270_at               | Apobec1     | apolipoprotein B mRNA editing enzyme, catalytic polypeptide 1                            | 1.50                  | 0.01534 | 1.58                  | 0.01536 |
| 1370249_at               | Tspo        | translocator protein                                                                     | 1.49                  | 0.01378 | 1.35                  | 0.00348 |
| 1378140_at               | Arl11       | ADP-ribosylation factor-like 11                                                          | 1.48                  | 0.02064 | 1.94                  | 0.00343 |
| 1381311_at               | Emr1        | EGF-like module containing, mucin-like, hormone receptor-like 1                          | 1.48                  | 0.01314 | 1.88                  | 0.01253 |
| 1372397_at               | LOC686733   | similar to TIP41, TOR signalling pathway regulator-like                                  | 1.45                  | 0.03628 | 1.91                  | 0.04804 |
| 1372397_at               | Tipr1       | TIP41, TOR signaling pathway regulator-like (S. cerevisiae)                              | 1.45                  | 0.03628 | 1.91                  | 0.04804 |
| 1389873_at               | Pycard      | PYD and CARD domain containing                                                           | 1.44                  | 0.01154 | 1.11                  | 0.00233 |
| 1370215_at               | C1qb        | complement component 1, q subcomponent, B chain                                          | 1.44                  | 0.01829 | 1.49                  | 0.00008 |
| 1393347_at               | Itgal       | integrin, alpha L                                                                        | 1.42                  | 0.03606 | 1.14                  | 0.03066 |
| 1380537_at               | Nckap1l     | NCK associated protein 1 like                                                            | 1.42                  | 0.00055 | 1.18                  | 0.00252 |
| 1367846_at               | S100a4      | s100 calcium-binding protein A4                                                          | 1.41                  | 0.02154 | 1.61                  | 0.00468 |
| 1371482_at               | LOC498279   | similar to NADH dehydrogenase (ubiquinone) Fe-S protein 2                                | 1.41                  | 0.01444 | 1.47                  | 0.00026 |
| 1380063_at               | Ch25h       | cholesterol 25-hydroxylase                                                               | 1.39                  | 0.04919 | 1.15                  | 0.00995 |
| 1387627_at               | Cd86        | cd86 molecule                                                                            | 1.38                  | 0.00576 | 1.46                  | 0.01374 |
| 1368010_at               | Ptpn6       | protein tyrosine phosphatase, non-receptor type 6                                        | 1.38                  | 0.02474 | 1.29                  | 0.00171 |
| 1371079_at               | Fcgr2b      | Fc fragment of IgG, low affinity IIb, receptor (CD32)                                    | 1.36                  | 0.01038 | 1.50                  | 0.00334 |
| 1388267_a_at             | Mt1a        | metallothionein 1a                                                                       | 1.35                  | 0.03417 | 1.88                  | 0.00134 |
| 1368518_at               | Cd53        | cd53 molecule                                                                            | 1.34                  | 0.01032 | 1.25                  | 0.00003 |
| 1376652_at               | C1qa        | complement component 1, q subcomponent, A chain                                          | 1.33                  | 0.02342 | 1.46                  | 0.00411 |
| 1393219_at               | C2          | complement component 2                                                                   | 1.33                  | 0.04749 | 1.40                  | 0.03137 |
| 1374838_at               | Sp140       | SP140 nuclear body protein                                                               | 1.32                  | 0.00745 | 1.04                  | 0.00892 |
| 1391637_at               | LOC310190   | rho GTPase activating protein 15                                                         | 1.32                  | 0.00837 | 1.21                  | 0.01302 |
| 1377340_at               | Tfpi2       | tissue factor pathway inhibitor 2                                                        | 1.32                  | 0.01717 | 1.63                  | 0.01599 |
| 1378180_at               | LOC290741   | dCMP deaminase                                                                           | 1.32                  | 0.01100 | 0.84                  | 0.02191 |
| 1382043_at               | Unc93b1     | unc-93 homolog B1 (C. elegans)                                                           | 1.30                  | 0.00961 | 0.92                  | 0.01515 |
| 1384298_at               | Myo1f       | myosin IF                                                                                | 1.29                  | 0.03092 | 1.32                  | 0.00245 |
| 1369382_at               | Mertk       | c-mer proto-oncogene tyrosine kinase                                                     | 1.29                  | 0.02870 | 1.14                  | 0.00534 |
| 1379760_at               | Tnfaiip8l2  | tumor necrosis factor, alpha-induced protein 8-like 2                                    | 1.27                  | 0.00014 | 0.89                  | 0.02152 |
| 1373669_at               | Gnpda2      | glucosamine-6-phosphate deaminase 2                                                      | 1.26                  | 0.03160 | 1.78                  | 0.00220 |
| 1388784_at               | Csf1r       | colony stimulating factor 1 receptor                                                     | 1.26                  | 0.00649 | 1.10                  | 0.00837 |
| 1387198_at               | Inpp5d      | inositol polyphosphate-5-phosphatase D                                                   | 1.26                  | 0.00153 | 1.21                  | 0.00709 |
| 1387195_at               | Stt4        | suppression of tumorigenicity 14 (colon carcinoma)                                       | 1.24                  | 0.00075 | 1.46                  | 0.00386 |
| 1369204_at               | Hck         | hemopoietic cell kinase                                                                  | 1.22                  | 0.02925 | 0.86                  | 0.00755 |
| 1369186_at               | Casp1       | caspase 1                                                                                | 1.20                  | 0.00171 | 1.00                  | 0.00374 |
| 1370885_at               | Ctsz        | cathepsin Z                                                                              | 1.20                  | 0.03633 | 1.25                  | 0.00414 |
| 1394134_at               | LOC499337   | dedicator of cytokinesis 8                                                               | 1.20                  | 0.02670 | 1.24                  | 0.00388 |
| 1386987_at               | Il6ra       | interleukin 6 receptor, alpha                                                            | 1.19                  | 0.00440 | 0.88                  | 0.03355 |
| 1395663_at               | Mall        | mal, T-cell differentiation protein-like                                                 | 1.18                  | 0.02080 | 1.37                  | 0.00048 |
| 1370407_at               | Peyox1      | prenylcysteine oxidase 1                                                                 | 1.18                  | 0.02997 | 1.61                  | 0.02707 |
| 1367974_at               | Anxa3       | annexin A3                                                                               | 1.15                  | 0.00403 | 1.00                  | 0.01502 |
| 1373204_at               | Tmem176a    | transmembrane protein 176A                                                               | 1.15                  | 0.00329 | 1.28                  | 0.00018 |
| 1382531_at               | Tlr7        | toll-like receptor 7                                                                     | 1.14                  | 0.02825 | 0.98                  | 0.03055 |
| 1378633_at               | Lpxn        | leupaxin                                                                                 | 1.13                  | 0.03528 | 1.12                  | 0.02954 |
| 1392648_at               | Mrc2        | mannose receptor, C type 2                                                               | 1.13                  | 0.04010 | 1.36                  | 0.01450 |
| 1385324_x_at             | RGD1561413  | similar to BC021442 protein                                                              | 1.12                  | 0.01048 | 1.24                  | 0.04768 |
| 1370219_at               | Cyba        | cytochrome b-245, alpha polypeptide                                                      | 1.12                  | 0.01176 | 1.11                  | 0.00747 |
| 1367786_at               | Psmb8       | proteasome (prosome, macropain) subunit, beta type 8 (large multifunctional peptidase 7) | 1.10                  | 0.02084 | 0.83                  | 0.02219 |
| 1386125_at               | Hoxb4       | homeo box B4                                                                             | 1.10                  | 0.03464 | 1.00                  | 0.01585 |
| 1388792_at               | Gadd45g     | growth arrest and DNA-damage-inducible, gamma                                            | 1.09                  | 0.00358 | 0.75                  | 0.02457 |
| 1380521_at               | Hcls1       | hematopoietic cell specific Lyn substrate 1                                              | 1.08                  | 0.00519 | 1.17                  | 0.00139 |
| 1382311_at               | LOC310877   | TRAF-interacting protein with forkhead-associated domain                                 | 1.07                  | 0.04138 | 0.74                  | 0.03675 |
| 1382680_at               | Adfp        | adipose differentiation related protein                                                  | 1.07                  | 0.01147 | 1.12                  | 0.00913 |

| Probe ID     | Gene symbol | Gene full name                                                                           | 1W Log2 (fold change) | p Value | 3W Log2 (fold change) | p Value |
|--------------|-------------|------------------------------------------------------------------------------------------|-----------------------|---------|-----------------------|---------|
| 1390226_at   | RGD1562552  | similar to hypothetical protein LOC340061                                                | 1.07                  | 0.01678 | 0.91                  | 0.02630 |
| 1389885_at   | Limd2       | LIM domain containing 2                                                                  | 1.07                  | 0.02417 | 0.78                  | 0.03429 |
| 1372042_at   | Cntm3       | CKLF-like MARVEL transmembrane domain containing 3                                       | 1.06                  | 0.01772 | 1.02                  | 0.00683 |
| 1390050_at   | LOC682869   | similar to Golgi phosphoprotein 2 (Golgi membrane protein GP73)                          | 1.06                  | 0.00531 | 0.90                  | 0.00032 |
| 1391351_at   | LOC680133   | similar to TBC1 domain family, member 8                                                  | 1.05                  | 0.03702 | 1.04                  | 0.04521 |
| 1383131_at   | Itgb2       | integrin, beta 2                                                                         | 1.03                  | 0.00778 | 1.30                  | 0.00864 |
| 1383780_at   | Hectd2      | HECT domain containing 1                                                                 | 1.03                  | 0.00760 | 0.87                  | 0.03970 |
| 1372013_at   | Ifitm1      | interferon induced transmembrane protein 1                                               | 1.01                  | 0.02750 | 1.27                  | 0.01786 |
| 1377950_at   | RGD1309362  | similar to interferon-inducible GTPase                                                   | 1.01                  | 0.03662 | 1.35                  | 0.02164 |
| 1383658_at   | Laptm5      | lysosomal protein transmembrane 5                                                        | 1.01                  | 0.01825 | 1.09                  | 0.00040 |
| 1388562_at   | Stard7      | StAR-related lipid transfer (START) domain containing 7                                  | 1.01                  | 0.00022 | 0.84                  | 0.00162 |
| 1385605_at   | LOC688730   | G protein-coupled receptor 84                                                            | 1.00                  | 0.00087 | 0.90                  | 0.00130 |
| 1385605_at   | LOC684132   | similar to G protein-coupled receptor 84                                                 | 1.00                  | 0.00087 | 0.90                  | 0.00130 |
| 1379957_at   | Slnf8       | schlafen 8                                                                               | 1.00                  | 0.00660 | 0.66                  | 0.02624 |
| 1389408_at   | Rrm2        | ribonucleotide reductase M2                                                              | 0.99                  | 0.03082 | 1.26                  | 0.02806 |
| 1392834_at   | Chd11       | chromodomain helicase DNA binding protein 1-like                                         | 0.99                  | 0.02946 | 1.04                  | 0.02032 |
| 1383011_at   | Eif2a       | eukaryotic translation initiation factor 2A                                              | 0.99                  | 0.02964 | 1.15                  | 0.02933 |
| 1368190_at   | Ren         | renin                                                                                    | 0.98                  | 0.02643 | 1.01                  | 0.00349 |
| 1368840_at   | Tmem176b    | transmembrane protein 176B                                                               | 0.98                  | 0.00365 | 1.04                  | 0.00125 |
| 1369611_at   | Bcl2l2      | bcl2-like 2                                                                              | 0.97                  | 0.01814 | 0.95                  | 0.00826 |
| 1373523_at   | Fcgr3       | Fc fragment of IgG, low affinity IIIa                                                    | 0.96                  | 0.00863 | 0.97                  | 0.00159 |
| 1371583_at   | Rbm3        | RNA binding motif (RNP1, RRM) protein 3                                                  | 0.96                  | 0.00521 | 1.17                  | 0.02956 |
| 1397907_at   | LOC501736   | Cd300a molecule                                                                          | 0.96                  | 0.01279 | 1.17                  | 0.00970 |
| 1373421_at   | Tgif1       | TGFB-induced factor homeobox 1                                                           | 0.95                  | 0.03898 | 1.08                  | 0.04339 |
| 1383372_at   | Ptatr       | platelet-activating factor receptor                                                      | 0.94                  | 0.02968 | 0.91                  | 0.00216 |
| 1390050_at   | LOC680692   | similar to Golgi phosphoprotein 2 (Golgi membrane protein GP73)                          | 0.94                  | 0.00657 | 0.74                  | 0.00116 |
| 1370186_at   | Psmb9       | proteasome (prosome, macropain) subunit, beta type 9 (large multifunctional peptidase 2) | 0.91                  | 0.01743 | 0.74                  | 0.02271 |
| 1383095_at   | LOC681292   | hypothetical protein LOC681292                                                           | 0.91                  | 0.00511 | 0.79                  | 0.00372 |
| 1386899_at   | Ctsh        | cathepsin H                                                                              | 0.89                  | 0.00328 | 0.94                  | 0.00084 |
| 1386893_at   | Grn         | granulin                                                                                 | 0.89                  | 0.00776 | 1.18                  | 0.00077 |
| 1368012_at   | Tep1        | telomerase associated protein 1                                                          | 0.89                  | 0.00472 | 0.84                  | 0.00230 |
| 1374565_at   | Nek6        | NIMA (never in mitosis gene a)-related kinase 6                                          | 0.89                  | 0.00511 | 0.79                  | 0.02160 |
| 1390569_at   | Cndp1       | carnosine dipeptidase 1 (metallopeptidase M20 family)                                    | 0.85                  | 0.00050 | 0.74                  | 0.01381 |
| 1371256_at   | Ptpn18      | protein tyrosine phosphatase, non-receptor type 18                                       | 0.85                  | 0.01833 | 0.65                  | 0.03469 |
| 1388699_at   | Man2b1      | mannosidase, alpha, class 2B, member 1                                                   | 0.84                  | 0.01137 | 0.83                  | 0.02209 |
| 1397399_at   | Parp12      | poly (ADP-ribose) polymerase family, member 12                                           | 0.84                  | 0.02761 | 0.88                  | 0.02132 |
| 1383407_at   | Sash3       | SAM and SH3 domain containing 3                                                          | 0.84                  | 0.03668 | 0.83                  | 0.01183 |
| 1370449_at   | P2ry13      | purinergic receptor P2Y, G-protein coupled, 13                                           | 0.83                  | 0.03023 | 0.66                  | 0.00713 |
| 1375211_at   | Rnaset2     | ribonuclease T2                                                                          | 0.82                  | 0.01711 | 0.81                  | 0.00056 |
| 1385733_at   | Exo1        | exonuclease 1                                                                            | 0.82                  | 0.02126 | 1.11                  | 0.04599 |
| 1376776_at   | LOC500528   | coiled-coil domain containing 17                                                         | 0.82                  | 0.01478 | 0.86                  | 0.02466 |
| 1371037_at   | Pros1       | protein S (alpha)                                                                        | 0.82                  | 0.00840 | 0.81                  | 0.00930 |
| 1382707_at   | Rps6ka3     | ribosomal protein S6 kinase polypeptide 3                                                | 0.81                  | 0.00157 | 1.21                  | 0.00001 |
| 1373443_a_at | Ankra2      | ankyrin repeat, family A (RFXANK-like), 2                                                | 0.81                  | 0.01608 | 1.19                  | 0.01922 |
| 1376579_at   | Lap3        | leucine aminopeptidase 3                                                                 | 0.81                  | 0.00645 | 1.38                  | 0.01541 |
| 1386982_at   | Mgat2       | mannosyl (alpha-1,6-)-glycoprotein beta-1,2-N-acetylglucosaminyltransferase              | 0.80                  | 0.02068 | 0.94                  | 0.03473 |
| 1398453_at   | LOC498957   | kelch-like family member 36                                                              | 0.80                  | 0.00136 | 0.75                  | 0.00142 |
| 1383248_at   | Fmo5        | flavin containing monooxygenase 5                                                        | 0.80                  | 0.04368 | 0.81                  | 0.00145 |
| 1377899_at   | RGD1304982  | similar to RIKEN cDNA 2810025M15                                                         | 0.79                  | 0.02109 | 0.66                  | 0.02428 |
| 1377369_at   | Cybr1       | cytochrome b reductase 1                                                                 | 0.78                  | 0.00252 | 1.04                  | 0.02479 |
| 1370891_at   | Cd48        | cd48 molecule                                                                            | 0.78                  | 0.01258 | 1.36                  | 0.04950 |
| 1368332_at   | Gbp2        | guanylate binding protein 2                                                              | 0.77                  | 0.00042 | 0.88                  | 0.00733 |
| 1370254_at   | Clic6       | chloride intracellular channel 5                                                         | 0.76                  | 0.03163 | 1.02                  | 0.03416 |
| 1383673_at   | Nap1l2      | nucleosome assembly protein 1-like 2                                                     | 0.76                  | 0.04373 | 1.00                  | 0.04708 |
| 1390707_at   | Rgs10       | regulator of G-protein signaling 10                                                      | 0.76                  | 0.01622 | 0.65                  | 0.01951 |
| 1367515_at   | Cnot7       | CCR4-NOT transcription complex, subunit 7                                                | 0.75                  | 0.03380 | 0.87                  | 0.01289 |
| 1376795_at   | Pik3ap1     | phosphoinositide-3-kinase adaptor protein 1                                              | 0.74                  | 0.03990 | 0.87                  | 0.02528 |
| 1398892_at   | Npc2        | niemann-pick disease, type C2                                                            | 0.73                  | 0.00542 | 0.88                  | 0.00064 |
| 1392189_at   | Rfx4        | regulatory factor X, 4 (influences HLA class II expression)                              | 0.73                  | 0.03452 | 0.79                  | 0.03114 |
| 1367679_at   | HLA-DMB     | major histocompatibility complex, class II, DM beta                                      | 0.73                  | 0.02672 | 0.72                  | 0.00755 |
| 1391355_at   | LOC679389   | hypothetical protein LOC679389                                                           | 0.72                  | 0.02751 | 0.86                  | 0.04664 |
| 1393043_at   | Utp18       | UTP18, small subunit (SSU) processome component, homolog (yeast)                         | 0.72                  | 0.04853 | 0.96                  | 0.03546 |
| 1387005_at   | Ctss        | cathepsin S                                                                              | 0.70                  | 0.00157 | 0.76                  | 0.00184 |
| 1394819_at   | Sp110       | SP110 nuclear body protein                                                               | 0.70                  | 0.03213 | 0.61                  | 0.03686 |
| 1374061_at   | Cd302       | cd302 molecule                                                                           | 0.69                  | 0.03300 | 0.74                  | 0.04312 |
| 1375921_at   | Ren1        | reticulocalbin 1, EF-hand calcium binding domain                                         | 0.69                  | 0.02632 | 0.66                  | 0.02794 |
| 1390472_at   | Naaa        | N-acylthanolamine acid amidase                                                           | 0.69                  | 0.00725 | 0.75                  | 0.00904 |
| 1373252_at   | LOC300225   | similar to formin-like 3 protein                                                         | 0.69                  | 0.01206 | 0.66                  | 0.00804 |
| 1389294_at   | Cyfp1       | cytoplasmic FMR1 interacting protein 1                                                   | 0.67                  | 0.00537 | 0.64                  | 0.02893 |
| 1383241_at   | Clr         | complement component 1, r subcomponent                                                   | 0.67                  | 0.01359 | 0.96                  | 0.01598 |
| 1372112_at   | RGD1304579  | tripartite motif-containing 5                                                            | 0.65                  | 0.00218 | 0.67                  | 0.02462 |
| 1388455_at   | Gng10       | guanine nucleotide binding protein (G protein), gamma 10                                 | 0.64                  | 0.04157 | 0.64                  | 0.02737 |
| 1383089_at   | Rab21       | RAB21, member RAS oncogene family                                                        | 0.64                  | 0.02304 | 0.71                  | 0.02777 |
| 1388140_at   | Rab13       | RAB13, member RAS oncogene family                                                        | 0.63                  | 0.02674 | 0.77                  | 0.00251 |
| 1368728_at   | P2ry12      | purinergic receptor P2Y, G-protein coupled, 12                                           | 0.63                  | 0.00089 | 0.68                  | 0.01970 |
| 1389229_at   | Acpl2       | acid phosphatase-like 2                                                                  | 0.63                  | 0.02464 | 0.66                  | 0.04092 |
| 1367794_at   | A2m         | alpha-2-macroglobulin                                                                    | 0.62                  | 0.01430 | 0.60                  | 0.00152 |
| 1384017_at   | Lrrk1       | Leucine-rich repeat kinase 1                                                             | 0.60                  | 0.03486 | 0.61                  | 0.00962 |
| 1373222_at   | Hexa        | hexosaminidase A                                                                         | 0.60                  | 0.00791 | 0.76                  | 0.00493 |
| 1375228_at   | Brd2        | bromodomain containing 2                                                                 | 0.60                  | 0.00512 | 0.66                  | 0.00972 |
| 1391463_at   | Ddx58       | DEAD (Asp-Glu-Ala-Asp) box polypeptide 58                                                | 0.59                  | 0.00986 | 0.62                  | 0.04171 |

| Probe ID                   | Gene symbol | Gene full name                                                                                     | 1W Log2 (fold change) | p Value | 3W Log2 (fold change) | p Value |
|----------------------------|-------------|----------------------------------------------------------------------------------------------------|-----------------------|---------|-----------------------|---------|
| <b>Downregulated genes</b> |             |                                                                                                    |                       |         |                       |         |
| 1369715_at                 | Slc6a11     | solute carrier family 6 (neurotransmitter transporter, GABA), member 11                            | -1.34                 | 0.04452 | -1.75                 | 0.01381 |
| 1369667_at                 | Vps52       | vacuolar protein sorting 52 homolog (S. cerevisiae)                                                | -1.28                 | 0.00935 | -1.17                 | 0.02778 |
| 1387155_at                 | Pcsk2       | proprotein convertase subtilisin/kexin type 2                                                      | -1.23                 | 0.04643 | -1.74                 | 0.01628 |
| 1391856_at                 | Sema3g      | sema domain, immunoglobulin domain (Ig), short basic domain, secreted, (semaphorin) 3G             | -1.12                 | 0.02136 | -1.06                 | 0.02515 |
| 1369102_at                 | Mapk10      | mitogen activated protein kinase 10                                                                | -1.03                 | 0.00145 | -0.91                 | 0.01514 |
| 1369054_at                 | Rph3a       | rabphilin 3A                                                                                       | -0.98                 | 0.01792 | -0.96                 | 0.01126 |
| 1382067_at                 | LOC685859   | UBX domain protein 2A                                                                              | -0.98                 | 0.04772 | -1.11                 | 0.04262 |
| 1381542_at                 | LOC679377   | similar to UBX domain containing 4                                                                 | -0.98                 | 0.04772 | -1.11                 | 0.04262 |
| 1370901_at                 | RGD1306215  | similar to hypothetical protein MGC36831                                                           | -0.96                 | 0.01156 | -0.82                 | 0.02557 |
| 1384095_at                 | Myrip       | myosin VIIA and Rab interacting protein                                                            | -0.95                 | 0.04026 | -1.04                 | 0.04151 |
| 1390815_at                 | Cnnm1       | Cyclin M1                                                                                          | -0.94                 | 0.02603 | -1.05                 | 0.02732 |
| 1392749_at                 | Cntfr       | ciliary neurotrophic factor receptor                                                               | -0.92                 | 0.02624 | -0.89                 | 0.00726 |
| 1394668_at                 | Cadm3       | cell adhesion molecule 3                                                                           | -0.89                 | 0.01867 | -0.91                 | 0.02290 |
| 1369046_at                 | Syt6        | synaptotagmin VI                                                                                   | -0.88                 | 0.00083 | -0.82                 | 0.00912 |
| 1376972_at                 | Slc40a1     | solute carrier family 39 (iron-regulated transporter), member 1                                    | -0.88                 | 0.04083 | -0.71                 | 0.04196 |
| 1384652_at                 | Htatsf1     | HIV-1 Tat specific factor 1                                                                        | -0.88                 | 0.00013 | -0.84                 | 0.03041 |
| 1397696_at                 | RGD1307830  | similar to cDNA sequence BC003331                                                                  | -0.86                 | 0.00298 | -0.97                 | 0.03178 |
| 1389725_at                 | Tm7sf2      | transmembrane 7 superfamily member 2                                                               | -0.85                 | 0.00250 | -0.71                 | 0.00299 |
| 1382608_at                 | Actl6b      | actin-like 6B                                                                                      | -0.85                 | 0.02632 | -1.11                 | 0.01624 |
| 1393947_at                 | Slc25a15    | solute carrier family 25 (mitochondrial carrier; ornithine transporter) member 15                  | -0.85                 | 0.03586 | -1.13                 | 0.02234 |
| 1391748_at                 | P42pop      | mypop Myb-related transcription factor, partner of profilin                                        | -0.84                 | 0.00044 | -0.64                 | 0.01563 |
| 1393353_at                 | RGD1304810  | similar to 6430573F11Rik protein                                                                   | -0.83                 | 0.01621 | -1.06                 | 0.00769 |
| 1370125_at                 | Hapln1      | hyaluronan and proteoglycan link protein 1                                                         | -0.81                 | 0.01974 | 0.88                  | 0.03019 |
| 1392882_at                 | RGD1305110  | similar to KIAA1841 protein                                                                        | -0.80                 | 0.04792 | -0.97                 | 0.03848 |
| 1395008_at                 | Itsn1       | intersectin 1 (SH3 domain protein)                                                                 | -0.80                 | 0.01961 | -0.73                 | 0.03721 |
| 1368572_a_at               | Grin1       | glutamate receptor, ionotropic, N-methyl D-aspartate 1                                             | -0.77                 | 0.02485 | -0.89                 | 0.02307 |
| 1380289_at                 | LOC691468   | similar to Zinc finger protein 84 (Zinc finger protein HPF2)                                       | -0.77                 | 0.01453 | -0.61                 | 0.02927 |
| 1387020_at                 | Cyp51       | cytochrome P450, family 51                                                                         | -0.77                 | 0.00328 | -0.75                 | 0.00344 |
| 1395985_at                 | Spg7        | spastic paraplegia 7 homolog (human)                                                               | -0.76                 | 0.00356 | -0.74                 | 0.02765 |
| 1385912_at                 | Dusp15      | dual specificity phosphatase 15                                                                    | -0.75                 | 0.02872 | -0.78                 | 0.04789 |
| 1375188_at                 | Katmb1      | katanin p80 (WD repeat containing) subunit B 1                                                     | -0.75                 | 0.01289 | -0.84                 | 0.00136 |
| 1377920_at                 | Sgtb        | small glutamine-rich tetratricopeptide repeat (TPR)-containing, beta                               | -0.75                 | 0.00737 | -0.98                 | 0.01477 |
| 1387068_at                 | Arc         | activity-regulated cytoskeleton-associated protein                                                 | -0.74                 | 0.00260 | -0.81                 | 0.00217 |
| 1374608_at                 | LOC500295   | DNase domain containing 2                                                                          | -0.74                 | 0.04158 | -0.63                 | 0.00913 |
| 1385069_at                 | Acvr1       | activin A receptor, type I                                                                         | -0.74                 | 0.00274 | -0.95                 | 0.00374 |
| 1369781_at                 | Grm7        | glutamate receptor, metabotropic 7                                                                 | -0.73                 | 0.02614 | -0.97                 | 0.01380 |
| 1372617_at                 | Btbd2       | BTB (POZ) domain containing 2                                                                      | -0.71                 | 0.02613 | -0.78                 | 0.00323 |
| 1372841_at                 | Reep6       | receptor accessory protein 6                                                                       | -0.70                 | 0.04454 | -0.85                 | 0.02030 |
| 1389634_at                 | Metap1      | methionyl aminopeptidase 1                                                                         | -0.69                 | 0.04329 | -1.07                 | 0.02714 |
| 1369180_at                 | Bcl2l1      | Bcl2-like 1                                                                                        | -0.69                 | 0.01611 | -0.84                 | 0.00799 |
| 1387976_at                 | Slc9a3r2    | solute carrier family 9 (sodium/hydrogen exchanger), member 3 regulator 2                          | -0.68                 | 0.00415 | -0.76                 | 0.02156 |
| 1390513_at                 | LOC687609   | similar to ras homolog gene family, member f                                                       | -0.67                 | 0.00187 | -0.71                 | 0.01039 |
| 1397861_at                 | Vstm2b      | V-set and transmembrane domain containing 2B                                                       | -0.65                 | 0.01260 | -0.69                 | 0.00850 |
| 1392967_at                 | MGC116121   | similar to RIKEN cDNA 2700062C07                                                                   | -0.64                 | 0.03161 | -0.62                 | 0.03544 |
| 1387676_at                 | Mark1       | MAP/microtubule affinity-regulating kinase 1                                                       | -0.63                 | 0.01438 | -1.01                 | 0.00996 |
| 1370144_at                 | LOC689842   | similar to Nucleolar GTP-binding protein 1 (Chronic renal failure gene protein) (GTP-binding prote | -0.63                 | 0.02628 | -0.72                 | 0.01606 |
| 1369813_at                 | Dnajc5      | dnaJ (Hsp40) homolog, subfamily C, member 5                                                        | -0.61                 | 0.04069 | -1.07                 | 0.01613 |
| 1368425_at                 | Caskin1     | CASK interacting protein 1                                                                         | -0.61                 | 0.03034 | -0.65                 | 0.01883 |
| 1384741_at                 | Pla2g3      | phospholipase A2, group III                                                                        | -0.61                 | 0.00838 | -0.64                 | 0.01325 |
| 1396409_at                 | Dtnb        | dystrobrevin, beta                                                                                 | -0.61                 | 0.01074 | -0.71                 | 0.01782 |
| 1385526_at                 | LOC365601   | autophagy related 5                                                                                | -0.60                 | 0.00953 | -0.75                 | 0.03545 |
| 1370208_at                 | Nr1h2       | nuclear receptor subfamily 1, group H, member 2                                                    | -0.60                 | 0.03252 | -0.66                 | 0.02612 |
| 1375401_at                 | Mvk         | mevalonate kinase                                                                                  | -0.60                 | 0.00057 | -0.67                 | 0.00058 |
| 1388536_at                 | Bat2        | HLA-B associated transcript 2                                                                      | -0.60                 | 0.00069 | -0.75                 | 0.02364 |
| 1369086_a_at               | Cacna1d     | calcium channel, voltage-dependent, L type, alpha 1D subunit                                       | -0.60                 | 0.04068 | -0.74                 | 0.02200 |
| 1375580_at                 | Dpp10       | dipeptidyl peptidase 10                                                                            | -0.59                 | 0.02525 | -0.72                 | 0.00746 |
| 1381406_at                 | RGD1561734  | similar to KIAA1913                                                                                | -0.59                 | 0.04027 | -0.81                 | 0.01109 |
