# Supplementary material for: Molecular and Cellular Changes in the Lumbar Spinal Cord following Thoracic Injury: Regulation by Treadmill Locomotor Training
Source: PubMed Central journal article supplement (PMC3919755; doi:10.1371/journal.pone.0088215), 2014-02-10
Supplement: pone.0088215.s004.pdf [file pone.0088215.s004.pdf]

**Table S4. A list of genes that were differentially regulated by treadmill training in sham operated animals**

| Probe ID                   | Gene symbol | Gene full name                                                                                                                          | Log2 (fold change) | p Value |
|----------------------------|-------------|-----------------------------------------------------------------------------------------------------------------------------------------|--------------------|---------|
| <b>Upregulated genes</b>   |             |                                                                                                                                         |                    |         |
| 1387828_at                 | Agap2       | ArlGAP with GTPase domain, ankyrin repeat and PH domain 2                                                                               | 2.72               | 0.02335 |
| 1373195_at                 | Fus         | fusion (involved in t(12;16) in malignant liposarcoma) (human)                                                                          | 1.37               | 0.01480 |
| 1391815_at                 | Rpusd3      | RNA pseudouridylylase synthase domain containing 3                                                                                      | 1.31               | 0.01334 |
| 1398388_at                 | UNK         | unkempt homolog (Drosophila)                                                                                                            | 1.28               | 0.02185 |
| 1373409_at                 | UBE3C       | ubiquitin protein ligase E3C                                                                                                            | 1.11               | 0.00132 |
| 1395715_at                 | Cdgap       | cde42 GTPase-activating protein                                                                                                         | 1.06               | 0.00948 |
| 1367771_at                 | Tsc22d3     | TSC22 domain family, member 3                                                                                                           | 1.02               | 0.00356 |
| 1383647_a_at               | Crb3        | crumbs homolog 3 (Drosophila)                                                                                                           | 1.01               | 0.02292 |
| 1392648_at                 | MRC2        | mannose receptor, C type 2                                                                                                              | 1.01               | 0.04829 |
| 1371092_at                 | LOC286991   | putative retrovirus-related gag protein                                                                                                 | 1.00               | 0.04291 |
| 1388297_at                 | Eef1g       | eukaryotic translation elongation factor 1 gamma                                                                                        | 0.98               | 0.00036 |
| 1367589_at                 | Aco2        | aconitase 2, mitochondrial                                                                                                              | 0.95               | 0.00003 |
| 1378914_a_at               | LOC308990   | hypothetical protein LOC308990                                                                                                          | 0.95               | 0.00870 |
| 1387762_s_at               | Jund        | jun D proto-oncogene                                                                                                                    | 0.91               | 0.04944 |
| 1389271_at                 | LOC679921   | vasorin                                                                                                                                 | 0.90               | 0.03177 |
| 1391019_at                 | LOC687214   | similar to Slit-like 2                                                                                                                  | 0.90               | 0.03177 |
| 1375637_at                 | RGD1311122  | similar to RIKEN cDNA 1110003E01                                                                                                        | 0.88               | 0.00102 |
| 1399070_at                 | LOC691036   | similar to SET binding factor 2                                                                                                         | 0.86               | 0.01853 |
| 1370045_at                 | Polg        | polymerase (DNA directed), gamma                                                                                                        | 0.86               | 0.00787 |
| 1368171_at                 | Lox         | lysyl oxidase                                                                                                                           | 0.85               | 0.01468 |
| 1376407_a_at               | Lsm7        | LSM7 homolog, U6 small nuclear RNA associated (S. cerevisiae)                                                                           | 0.85               | 0.02066 |
| 1398843_at                 | Vapa        | VAMP (vesicle-associated membrane protein)-associated protein A                                                                         | 0.85               | 0.00252 |
| 1385062_at                 | RGD1306072  | hypothetical LOC304654                                                                                                                  | 0.84               | 0.04598 |
| 1395737_at                 | Cd276       | cd276 molecule                                                                                                                          | 0.84               | 0.01144 |
| 1393510_at                 | Golsyn      | golgi-localized protein                                                                                                                 | 0.82               | 0.00055 |
| 1380517_at                 | Znfm3       | zinc finger, MYM-type 3                                                                                                                 | 0.82               | 0.01201 |
| 1395735_at                 | RGD1310271  | similar to hypothetical protein MGC45873                                                                                                | 0.82               | 0.02404 |
| 1373598_at                 | UBN1        | ubiquitin 1                                                                                                                             | 0.81               | 0.00181 |
| 1390569_at                 | Cndp1       | carnosine dipeptidase 1 (metallopeptidase M20 family)                                                                                   | 0.77               | 0.03893 |
| 1398453_at                 | LOC498957   | kelch-like family member 36                                                                                                             | 0.77               | 0.00891 |
| 1389469_at                 | Chd11       | chromodomain helicase DNA binding protein 1-like                                                                                        | 0.75               | 0.00710 |
| 1389095_at                 | Boc         | biregional cell adhesion molecule-related/down-regulated by oncogenes (Cdon) binding protein                                            | 0.73               | 0.03763 |
| 1377967_at                 | Cdt1        | chromatin licensing and DNA replication factor 1                                                                                        | 0.72               | 0.04509 |
| 1386160_at                 | Tchh        | trichohyalin                                                                                                                            | 0.72               | 0.03102 |
| 1374478_at                 | RGD1305347  | similar to RIKEN cDNA 261052811                                                                                                         | 0.71               | 0.04133 |
| 1371074_a_at               | Mcm6        | minichromosome maintenance complex component 6                                                                                          | 0.70               | 0.00027 |
| 1374456_at                 | LOC682900   | hypothetical protein LOC682900                                                                                                          | 0.70               | 0.04117 |
| 1368279_at                 | LOC679252   | similar to Myeloid/lymphoid or mixed-lineage leukemia protein 3 homolog (Histone-lysine N-methyltransferase, H3 lysine-4 specific MLL3) | 0.68               | 0.00197 |
| 1370908_at                 | HDAC7A      | histone deacetylase 7                                                                                                                   | 0.68               | 0.04534 |
| 1372312_at                 | Lvl1        | LTV1 homolog (S. cerevisiae)                                                                                                            | 0.68               | 0.02653 |
| 1376259_at                 | Prkceq      | protein kinase C, theta                                                                                                                 | 0.68               | 0.03199 |
| 1387195_at                 | St14        | suppression of tumorigenicity 14 (colon carcinoma)                                                                                      | 0.67               | 0.01803 |
| 1368187_at                 | Gpmb        | glycoprotein (transmembrane) nmb                                                                                                        | 0.67               | 0.00511 |
| 1386987_at                 | Il6ra       | interleukin 6 receptor, alpha                                                                                                           | 0.67               | 0.01844 |
| 1387874_at                 | Dbp         | D site of albumin promoter (albumin D-box) binding protein                                                                              | 0.66               | 0.00494 |
| 1368717_at                 | Faah        | fatty acid amide hydrolase                                                                                                              | 0.66               | 0.01965 |
| 1369161_at                 | Abcb4       | ATP-binding cassette, sub-family B (MDR/TAP), member 4                                                                                  | 0.66               | 0.03459 |
| 1393095_at                 | Tnks1bp1    | tankyrase 1 binding protein 1                                                                                                           | 0.64               | 0.04910 |
| 1398506_at                 | Ppp3ca      | Protein phosphatase 3 (formerly 2B), catalytic subunit, alpha isoform                                                                   | 0.63               | 0.03422 |
| 1385282_at                 | Nat14       | N-acetyltransferase 14                                                                                                                  | 0.62               | 0.02947 |
| 1386938_at                 | Anpep       | alanine aminopeptidase                                                                                                                  | 0.61               | 0.04808 |
| 1383017_at                 | Ptprm       | protein tyrosine phosphatase, receptor type, M                                                                                          | 0.61               | 0.00527 |
| 1374025_at                 | Nnmat3      | nicotinamide nucleotide adenylyltransferase 3                                                                                           | 0.61               | 0.00868 |
| 1391637_at                 | LOC295635   | Rho GTPase activating protein 15                                                                                                        | 0.61               | 0.02610 |
| 1369614_at                 | Rap2b       | RAP2B, member of RAS oncogene family                                                                                                    | 0.61               | 0.01152 |
| 1376977_at                 | Pter3       | Prostaglandin E receptor 3                                                                                                              | 0.60               | 0.02624 |
| 1384103_at                 | RGD1561416  | similar to novel protein (HT036)                                                                                                        | 0.60               | 0.03134 |
| 1387718_at                 | P2rx7       | purinergic receptor P2X, ligand-gated ion channel, 7                                                                                    | 0.60               | 0.00421 |
| 1378140_at                 | Arl11       | ADP-ribosylation factor-like 11                                                                                                         | 0.60               | 0.03299 |
| 1387247_at                 | Pcsk1       | proprotein convertase subtilisin/kexin type 1                                                                                           | 0.59               | 0.03824 |
| <b>Downregulated genes</b> |             |                                                                                                                                         |                    |         |
| 1375362_at                 | Spp12a      | signal peptide peptidase-like 2A                                                                                                        | -3.00              | 0.00771 |
| 1370545_at                 | Kcna1       | potassium voltage-gated channel, shaker-related subfamily, member 1                                                                     | -2.61              | 0.00733 |
| 1376654_at                 | RGD1308448  | similar to RIKEN cDNA B130016O10 gene                                                                                                   | -2.51              | 0.01592 |
| 1373046_at                 | Boll        | bol, boule-like (Drosophila)                                                                                                            | -2.38              | 0.00185 |
| 1368902_at                 | Pak3        | p21 protein (Cdc42/Rac)-activated kinase 3                                                                                              | -1.95              | 0.01593 |
| 1391075_at                 | Rgs17       | regulator of G-protein signaling 17                                                                                                     | -1.82              | 0.03396 |
| 1395326_at                 | Rbm9        | RNA binding motif protein 9                                                                                                             | -1.76              | 0.00908 |
| 1368841_at                 | Tcf4        | transcription factor 4                                                                                                                  | -1.75              | 0.01095 |
| 1378740_at                 | Rasal2      | RAS protein activator like 2                                                                                                            | -1.74              | 0.01789 |
| 1375259_at                 | Eif4ebp2    | eukaryotic translation initiation factor 4E binding protein 2                                                                           | -1.73              | 0.00063 |
| 1370520_at                 | LOC257650   | hippyrgranin                                                                                                                            | -1.73              | 0.02396 |
| 1375280_at                 | Fam152a     | desumoylating isopeptidase 2                                                                                                            | -1.68              | 0.00520 |
| 1383829_at                 | Bbx         | bobby sox homolog (Drosophila)                                                                                                          | -1.63              | 0.01513 |
| 1376436_at                 | Lysmd3      | putative peptidoglycan-binding domain containing 3                                                                                      | -1.56              | 0.01700 |
| 1376523_at                 | Arid4a      | AT rich interactive domain 4A (Rbp1 like)                                                                                               | -1.55              | 0.02867 |
| 1377926_at                 | Agap1       | ArlGAP with GTPase domain, ankyrin repeat and PH domain 1                                                                               | -1.50              | 0.02466 |
| 1391347_at                 | Rab8b       | RAB8B, member RAS oncogene family                                                                                                       | -1.48              | 0.01429 |
| 1392453_at                 | Clcn3       | chloride channel 3                                                                                                                      | -1.45              | 0.02845 |
| 1396131_at                 | Fam134c     | family with sequence similarity 134, member C                                                                                           | -1.41              | 0.00966 |
| 1387204_at                 | Negr1       | neuronal growth regulator 1                                                                                                             | -1.38              | 0.02257 |
| 1377061_at                 | Rics        | rho GTPase-activating protein                                                                                                           | -1.38              | 0.04416 |
| 1389978_at                 | LOC500378   | chromatin target of PRMT1                                                                                                               | -1.33              | 0.01436 |
| 1368958_at                 | Pacsin1     | protein kinase C and casein kinase substrate in neurons 1                                                                               | -1.33              | 0.03412 |
| 1394042_at                 | LOC682864   | similar to 82-kD FMRP Interacting Protein                                                                                               | -1.19              | 0.00183 |
| 1391405_at                 | Tsfd7a      | thrombospondin, type I, domain containing 7A                                                                                            | -1.16              | 0.04559 |
| 1390097_at                 | Tsply4      | TSPY-like 4                                                                                                                             | -1.15              | 0.00144 |
| 1369715_at                 | Slc6a11     | solute carrier family 6 (neurotransmitter transporter, GABA), member 11                                                                 | -1.13              | 0.04524 |
| 1376582_at                 | Med1        | mediator complex subunit 1                                                                                                              | -1.12              | 0.01483 |
| 1376644_at                 | Med19       | mediator complex subunit 19                                                                                                             | -1.12              | 0.02533 |
| 1383296_a_at               | Xpo4        | exportin 4                                                                                                                              | -1.09              | 0.00357 |
| 1394714_at                 | Atp2b1      | ATPase, Ca++ transporting, plasma membrane 1                                                                                            | -1.08              | 0.02325 |
| 1383112_at                 | Trps1       | trichorhinophalangeal syndrome 1 homolog (human)                                                                                        | -1.08              | 0.04632 |

| Probe ID     | Gene symbol | Gene full name                                                                         | Log2 (fold change) | p Value |
|--------------|-------------|----------------------------------------------------------------------------------------|--------------------|---------|
| 1387024_at   | Dusp6       | dual specificity phosphatase 6                                                         | -1.07              | 0.00018 |
| 1390179_at   | Ankrd52     | ankyrin repeat domain 52                                                               | -1.07              | 0.04940 |
| 1393910_at   | Fam13a1     | family with sequence similarity 13, member A1                                          | -1.06              | 0.03831 |
| 1376921_at   | Foxred1     | FAD-dependent oxidoreductase domain containing 1                                       | -1.05              | 0.02386 |
| 1369304_at   | Pts         | 6-pyruvoyl-tetrahydropterin synthase                                                   | -1.05              | 0.04936 |
| 1370016_at   | Nel2        | NEL-like 2 (chicken)                                                                   | -1.02              | 0.00129 |
| 1377042_at   | LOC681178   | polycomb group ring finger 5                                                           | -1.00              | 0.03551 |
| 1373177_x_at | LOC501485   | hypothetical LOC501485                                                                 | -1.00              | 0.04615 |
| 1369404_a_at | Nrxn1       | neurexin 1                                                                             | -0.99              | 0.01488 |
| 1370577_at   | Zfp455      | zinc finger protein 455                                                                | -0.96              | 0.03731 |
| 1373542_at   | Sphk2       | sphingosine kinase 2                                                                   | -0.95              | 0.00193 |
| 1387807_at   | Pafah1b1    | platelet-activating factor acetylhydrolase, isoform 1b, subunit 1                      | -0.95              | 0.01540 |
| 1388646_at   | Depdc6      | DEP domain containing MTOR-interacting protein                                         | -0.94              | 0.00312 |
| 1390099_at   | Ube3a       | ubiquitin protein ligase E3A                                                           | -0.93              | 0.02336 |
| 1388885_at   | Aph1a       | anterior pharynx defective 1 homolog A (C. elegans)                                    | -0.90              | 0.04092 |
| 1377325_a_at | LOC685076   | phosphoglucomutase 2-like 1                                                            | -0.90              | 0.02886 |
| 1370008_at   | Psmc3ip     | PSMC3 interacting protein                                                              | -0.88              | 0.04213 |
| 1392472_at   | LOC309957   | myocyte enhancer factor 2a                                                             | -0.87              | 0.02467 |
| 1370160_at   | Xpnpep1     | X-prolyl aminopeptidase (aminopeptidase P) 1, soluble                                  | -0.86              | 0.00377 |
| 1385692_at   | Slc10a4     | solute carrier family 10 (sodium/bile acid cotransporter family), member 4             | -0.86              | 0.00097 |
| 1374968_at   | Eif2c1      | eukaryotic translation initiation factor 2C, 1                                         | -0.85              | 0.00146 |
| 1384797_at   | Atf3        | atlastin GTPase 3                                                                      | -0.84              | 0.03538 |
| 1395074_at   | Tdg         | thymine-DNA glycosylase                                                                | -0.83              | 0.04127 |
| 1387060_at   | Klf6        | Kruppel-like factor 6                                                                  | -0.83              | 0.03239 |
| 1375785_at   | Fktn        | fukutin                                                                                | -0.83              | 0.00576 |
| 1377713_at   | Foxn3       | forkhead box N3                                                                        | -0.81              | 0.02659 |
| 1369248_a_at | Xiap        | X-linked inhibitor of apoptosis                                                        | -0.81              | 0.02896 |
| 1370912_at   | Hspa1a      | heat shock 70kD protein 1A                                                             | -0.80              | 0.00671 |
| 1367996_a_at | Lphn1       | latrophilin 1                                                                          | -0.79              | 0.04174 |
| 1381887_x_at | RGD1311595  | similar to KIAA2026 protein                                                            | -0.79              | 0.01104 |
| 1373497_at   | Hipk2       | homeodomain interacting protein kinase 2                                               | -0.79              | 0.01677 |
| 1397439_at   | LOC497978   | similar to diacylglycerol kinase epsilon                                               | -0.78              | 0.04424 |
| 1381462_at   | RGD1566130  | similar to mKIAA1940 protein                                                           | -0.77              | 0.04588 |
| 1382171_at   | LOC499624   | TSC22 domain family, member 2                                                          | -0.77              | 0.04328 |
| 1384516_at   | Mtf2        | metal response element binding transcription factor 2                                  | -0.75              | 0.03509 |
| 1396096_at   | Mgat4a      | mannosyl (alpha-1,3-)-glycoprotein beta-1,4-N-acetylglucosaminyltransferase, isozyme A | -0.73              | 0.00294 |
| 1399070_at   | Setd5       | SET domain containing 5                                                                | -0.72              | 0.00418 |
| 1367952_at   | Lrp2        | low density lipoprotein-related protein 2                                              | -0.69              | 0.04911 |
| 1375682_at   | Pura        | purine rich element binding protein A                                                  | -0.68              | 0.02906 |
| 1368903_at   | Strbp       | spermatid perinuclear RNA binding protein                                              | -0.67              | 0.02367 |
| 1390055_at   | RGD1306314  | predicted similar to KIAA0819 protein (predicted)                                      | -0.66              | 0.03016 |
| 1377582_at   | Tox3        | TOX high mobility group box family member 3                                            | -0.66              | 0.03296 |
| 1376576_at   | Dusp11      | dual specificity phosphatase 11 (RNA/RNP complex 1-interacting)                        | -0.65              | 0.03091 |
| 1369491_at   | Dao         | D-amino-acid oxidase                                                                   | -0.65              | 0.04924 |
| 1398588_at   | LOC303057   | SLU7 splicing factor homolog (S. cerevisiae)                                           | -0.64              | 0.00310 |
| 1375575_at   | Camk2b      | calcium/calmodulin-dependent protein kinase II beta                                    | -0.63              | 0.04114 |
| 1379218_at   | LOC365949   | similar to nemo like kinase                                                            | -0.63              | 0.02475 |
| 1390857_at   | Xylb        | xylulokinase homolog (H. influenzae)                                                   | -0.62              | 0.01318 |
| 1392560_at   | Pip5k1a     | phosphatidylinositol-4-phosphate 5-kinase, type 1, alpha                               | -0.60              | 0.00682 |
| 1376871_at   | RGD1562140  | similar to brain Zn-finger protein                                                     | -0.60              | 0.03539 |
| 1382265_at   | Gcap14      | granule cell antiserum positive 14                                                     | -0.59              | 0.03161 |
| 1387663_at   | Gmfb        | glia maturation factor, beta                                                           | -0.59              | 0.03126 |
